# Supplementary material for: Indian nurses’ beliefs on physical activity promotion practices for cancer survivors in a tertiary care hospital—a cross-sectional survey
Source: PeerJ. 2022 May 23;10:e13348. doi: 10.7717/peerj.13348 (PMC9135035; doi:10.7717/peerj.13348)
Supplement: Supplemental Information 1 [file peerj-10-13348-s001.xlsx]

## Sheet: Sheet1
SR NO	AGE	GENDER	Q3	Q4	Q5	Q6	LOCATION	Q12	Q13	PHR 8	PHR 9	PHR10	PHR 11	HLP 14 PRE	HLP 14 DUR	HLP 14 POST	HLP 15 PRE	HLP 15 DUR	HLP 15 POST	16 HRQL	17 HRQL	16 WT	17 WT	16 FATIGUE	17 FATIGUE	16 MENTAL	17MENTAL	16 ADL	17 ADL	16 CA	17 CA	16 CHRONIC	17 CHRONIC	16 TUMOR	17 TUMOR	16 NO B	17 NO B	18 MOT TIME	MOT 18 RISK TO PATIENT	MOT 18 ADEQUATE SS	MOT 18 KNOWLEDGE	MOT 18 EXPERTISE	MOT 18 PROMOTE	MOT 18 JOB	MOT 18 BARRIERS	OTHERS	MOT 19	MOT 20	MOT 21 TIME
1	22	F	2	2	0	PRIVATE	METRO	2	1	1	1,2,3	5	1,2,3	3	1	3	3	1	3	4	3	4	3	4	3	4	3	4	3	4	3	4	3	3	3	2	3	1	2	2	2	2	2	1	1	1	2	2	1
2	28	F	1	5	0	PRIVATE	METRO	1	1	1	1,2,3	5	1,2,3	3	1	3	3	1	3	4	3	4	3	4	3	4	3	4	3	4	3	4	3	3	3	2	3	2	1	2	2	2	1	1	1	1	2	2	1
3	24	F	1	3	0	PRIVATE	METRO	2	1	1	1,2,3	5	1,2,3	3	1	3	3	1	3	4	3	4	3	4	3	4	3	4	3	4	3	4	3	3	3	2	3	1	2	2	2	2	1	1	1	1	2	2	1
4	34	F	1	14	0	PRIVATE	REGIONAL	1	1	3	1,2,3	5	1,2,3	3	2	1	1	1	1	4	4	4	4	4	4	4	3	4	4	4	4	4	4	4	4		4	1	1	1	1	2	3	3	3	NA	2	2	1
5	33	F	1	7	0	PRIVATE	METRO	1	1	1	1	5	1,2	1	1	1	1	1	1	3	3	3	3	3	3	3	3	3	3	4	4	3	4	NA	4	2	2	1	1	1	1	1	1	1	1	1	NA	2	1
6	39	F	2	14	0	PRIVATE	REGIONAL	1	1	3	2	5	2,3	1	3	2	1	3	1	4	4	4	4	4	4	4	1	4	4	2	1	2	4	4	1		4	1	1	2	1	2	3	3	3	NA	1	2	1
7	23	F	1	3	0	PRIVATE	METRO	3	1	1	1,2,3	5	1,2,3	1	1	1	1	1	1	4	3	4	3	4	3	4	3	4	3	4	3	4	3	3	3	2	3	2	1	2	2	2	1	1	1	1	2	2	1
8	33	F	1	7	0	PRIVATE	METRO	1	1	1	1,2,3	5	1,2	1	3	2	1	3	1	3	3	3	3	3	3	3	3	3	3	4	4	3	4	NA	4	2	2	1	1	1	1	1	1	1	1	1	NA	2	1
9	42	F	2	18	0	PRIVATE	REGIONAL	1	1	3	1,2,3	5	1,2,3	3	2	1	1	1	1	4	4	4	4	4	4	4	3	4	4	4	4	4	4	4	4		NA	1	1	1	1	2	3	3	2	NA	2	2	1
10	32	F	2	10	0	PRIVATE	REGIONAL	1	1	3	1,2,3	5	1,2,3	3	2	1	1	1	1	4	4	4	4	4	4	4	3	4	4	4	4	4	4	4	4		NA	1	1	1	1	2	3	3	2	NA	2	2	1
11	27	F	1	4	0	PRIVATE	REGIONAL	1	1	3	1,2,3	5	1,2,3	3	2	1	1	1	1	4	4	4	4	4	4	4	3	4	4	4	4	4	4	4	4		NA	1	1	1	1	2	3	3	2	NA	2	2	1
12	27	F	1	4	0	PRIVATE	REGIONAL	1	1	3	1,2,3	5	1,2,3	3	2	1	1	1	1	3	3	3	3	3	3	3	3	3	3	3	3	3	3	3	3	3	3	1	1	1	1	2	3	3	2	NA	2	2	2
13	27	F	1	4	0	PRIVATE	REGIONAL	1	1	3	1,2,3	5	1,2,3	3	2	1	1	1	1	4	4	4	4	4	4	4	2	4	4	4	4	4	4	4	4		NA	1	1	1	1	2	3	3	2	NA	2	2	1
15		F	2	20	0	PRIVATE	REGIONAL	3	2	3	1	5	3	2	NA	NA	2	NA	NA	4	3	4	3	4	3	NA	3	2	3	3	3	4	3	2	3		NA	2	2	2	2	2	2	2	2	2	1	1	2
16	24	F	1	2	0	PRIVATE	REGIONAL	1	1	2	1	5	2	2	2	2	2	2	2	3	3	3	3	3	3	3	3	3	3	2	2	2	2	2	2	2	2	2	2	2	1	1	2	2	1	NA	3	1	1
17	26	F	1	3	0	PRIVATE	REGIONAL	3	2	3	1	5	3	NA	2	NA	NA	1	NA	3	3	4	3	4	3	1	3	4	3	4	3	4	3	2	3		3	1	2	2	2	2	2	2	2	2	1	1	2
18	23	F	2	2	0	PRIVATE	REGIONAL	2	2	3	2	5	1	1	1	1	1	1	1	4	3	3	3	2	3	3	3	3	3	3	3	3	3	3	3	2	2	2	2	2	2	2	2	2	2	2	3	1	2
19	39	F	2	15	1	PRIVATE	REGIONAL	3	2	3	3	3	3	2	NA	NA	NA	2	NA	3	3	3	3	3	3	3	3	3	3	3	3	3	3	3	3		3	2	2	2	2	2	2	2	2	2	3	1	2
20	24	F	1	4	0	PRIVATE	REGIONAL	2	1	6	2	5	1,2,3	1	3	1	1	3	1	3	3	2	3	2	3	3	3	3	3	2	2	2	3	3	3	1	1	3	NA	3	3	NA	NA	NA	NA	NA	2	1	NA
21	34	F	1	9	0	PRIVATE	REGIONAL	3	1	1	1,2	5	1	1	2	1	1	1	1	4	3	4	3	4	3	4	3	2	3	2	3	1	2	1	1	1	1	2	1	2	1	2	2	3	1	NA	2	1	2
22	44	F	1	20	0	PRIVATE	REGIONAL	1	1	NA	1,2	5	1,2	1	1	1	1	1	1	4	4	4	4	4	4	4	4	4	4	4	4	4	4	2	4	1	1	1	1	1	1	1	1	1	1	1	1	1	NA
23	40	F	1	8	0	PRIVATE	METRO	1	1	2	1,2,3	5	1,2	3	1	2	3	1	2	3	3	3	3	3	3	3	3	3	3	3	3	3	3	3	3	3	3	1	1	1	1	1	NA	NA	NA	NA	3	1	1
25	35	F	1	11	0	PRIVATE	REGIONAL	1	1	2	1,2	5	1,2,3	1	3	1	1	1	1	4	4	3	3	4	2	4	NA	NA	4	3	4	4	4	3	3	1	2	1	2	2	1	1	2	3	3	3	3	2	2
26	25	F	1	3	0	PRIVATE	REGIONAL	1	2	3	2	3	1,2,3	NA	2	1	NA	1	2	3	3	3	3	3	3	4	3	3	3	4	3	4	3	3	3	3	3	2	3	2	1	2	2	2	2	2	2	2	2
27	35	F	2	5	0	PRIVATE	REGIONAL	1	1	NA	1,2	5	1	1	2	1	1	1	1	3	3	3	3	3	3	3	3	2	3	2	3	1	2	1	1	1	1	2	1	2	1	2	2	3	1	NA	2	1	2
28	32	F	2	9	0	PRIVATE	REGIONAL	2	1	NA	1,2	5	1	1	2	1	1	1	1	4	3	3	3	3	3	3	3	3	3	2	3	1	2	1	1	1	1	2	1	2	1	2	2	3	1	NA	2	1	2
29	25	F	1	2	0	PRIVATE	REGIONAL	3	1	3	1	5	3	2	2	2	2	2	2	3	3	3	3	2	3	3	3	3	3	3	2	3	2	2	2	2	2	2	2	2	1	1	2	2	2	NA	3	1	1
30	31	F	2	5	0	PRIVATE	REGIONAL	3	1	3	1	5	3	2	2	2	2	2	2	3	3	3	3	3	3	3	3	3	3	3	3	3	3	NA	3		3	2	2	2	2	2	2	2	2	2	3	1	2
31	24	F	1	2	0	PRIVATE	REGIONAL	3	2	3	2	5	1	1	1	1	1	1	1	4	3	3	3	2	3	4	3	3	3	4	3	4	3	4	3	3	2	2	2	2	2	2	2	2	2	2	3	1	2
32	29	F	2	5	0	PUBLIC	REGIONAL	2	2	3	2	5	1	1	1	1	1	1	1	4	3	3	3	2	3	3	3	3	3	3	3	3	3	3	3	2	2	2	2	2	2	2	2	2	2	2	3	2	2
33	22	F	2	2	0	PRIVATE	REGIONAL	2	2	3	2	5	1	1	1	1	1	1	1	4	3	3	3	2	3	3	3	3	3	3	3	3	3	3	3		2	2	2	2	2	2	2	2	2	2	3	1	2
34	38	F	1	9	0	PRIVATE	REGIONAL	1	1	3	1	7	2	1	NA	NA	1	1	1	3	3	3	3	3	3	3	3	3	3	3	3	3	3	NA	3		3	2	2	2	2	2	2	2	2	2	2	1	2
35	24	F	1	2	0	PRIVATE	REGIONAL	2	2	3	2	5	1	1	1	1	1	1	1	4	3	3	3	2	3	3	3	3	3	3	3	3	3	3	3	2	2	2	2	2	2	2	2	2	2	2	3	1	2
36	53	F	2	30	0	PRIVATE	REGIONAL	1	1	2	2	5	2	1	NA	NA	1	NA	NA	4	3	3	3	3	3	3	3	3	3	3	3	3	3	1	3	1	3	3	3	3	3	3	3	3	3	3	3	2	3
37	35	F	1	13	0	PRIVATE	REGIONAL	1	1	2	1,2,3	3	2,3	2	2	1	1	1	1	3	4	3	3	3	3	4	4	3	3	3	3	4	4	2	2	1	1	NA	NA	1	1	NA	NA	NA	NA	NA	3	2	1
38	51	F	2	28	1	PRIVATE	REGIONAL	3	1	NA	2	5	1,2,3	1	2	1	1	2	1	3	3	3	3	3	3	3	4	3	3	3	3	4	4	4	2		NA	2	1	NA	1	NA	NA	NA	NA	NA	3	1	NA
39	49	F	2	22	0	PRIVATE	REGIONAL	1	1	3	2	5	1,2,3	1	1	1	1	1	1	3	3	3	3	4	NA	4	NA	3	NA	2	2	4	2	1	3		3	NA	NA	2	1	1	2	2	2	NA	2	1	2
40	47	F	1	21	0	PRIVATE	REGIONAL	1	1	3	2	1	2	1	1	1	NA	NA	1	3	3	3	3	4	3	3	3	3	3	2	3	2	3	NA	2		1	2	1	1	2	2	3	3	3	2	1	2	1
41	45	F	1	18	0	PRIVATE	REGIONAL	NA	1	3	NA	5	3	1	NA	NA	1	1	1	4	NA	4	NA	4	NA	4	NA	4	NA	4	NA	4	NA	NA	NA		1	1	1	1	1	1	1	1	1	1	NA	1	NA
42	40	F	1	18	5	PRIVATE	REGIONAL	1	1	NA	1,2	5	1	1	NA	NA	1	1	1	4	4	4	4	4	4	4	4	4	4	4	4	4	4	2	4	1	4	1	1	1	1	1	1	1	1	1	1	1	1
43	46	F	1	22	0	PRIVATE	REGIONAL	NA	1	3	2	5	3	1	NA	NA	1	NA	NA	4	4	4	4	4	4	4	4	4	4	4	4	4	4	NA	4		1	3	3	3	3	3	3	3	3	NA	1	2	3
44	32	F	1	13	0	PRIVATE	REGIONAL	1	1	NA	2	1	1	1	1	1	NA	NA	1	3	3	3	3	4	3	3	3	3	3	2	2	2	2	NA	2		1	2	1	1	2	1	3	3	3	2	1	2	1
45	28	F	1	4	0	PRIVATE	REGIONAL	1	1	NA	1,2	5	1	1	2	2	1	1	1	4	4	4	4	4	4	4	4	4	4	4	4	4	4	2	4	1	1	1	1	1	1	1	1	1	1	1	1	1	1
46	45	F	1	25	1	PRIVATE	REGIONAL	2	NA	3	2	5	2	1	NA	NA	NA	1	NA	1	1	1	2	2	2	3	1	3	1	3	2	3	1	NA	2		1	2	1	1	2	1	2	2	2	1	NA	NA	2
47	37	F	1	20	10	PRIVATE	METRO	1	1	NA	1,2	5	1,2	1	1	1	1	1	1	4	4	4	4	4	4	4	4	4	4	4	4	4	4	2	4	1	NA	1	1	1	1	1	1	1	1	1	1	1	NA
48	43	F	1	15	0	PRIVATE	REGIONAL	1	1	NA	2	1	2	1	1	1	NA	NA	1	3	3	3	3	4	3	3	3	3	3	2	2	2	2	NA	2		1	2	1	1	2	1	3	3	3	2	1	2	1
49	48	F	1	25	0	PRIVATE	METRO	1	1	3	1,2	5	1,2,3	NA	NA	NA	NA	NA	NA	4	3	3	3	3	4	4	3	3	3	2	3	3	3	2	3	1	3	2	NA	2	2	NA	NA	NA	NA	NA	2	1	2
50	29	F	1	3	0	PRIVATE	METRO	1	2	3	2	5	2	1	1	1	1	1	1	3	3	3	3	3	3	3	3	3	3	3	3	3	3	3	3		3	1	1	1	1	1	1	1	1	1	3	1	1
51	43	F	1	18	0	PRIVATE	REGIONAL	3	2	3	2	5	2	2	2	2	2	2	2	3	3	2	3	3	3	4	3	3	3	2	3	3	3	3	3	3	3	NA	2	NA	2	2	NA	NA	NA	NA	2	2	2
52	49	F	1	29	0	PRIVATE	RURAL	NA	1	3	3	5	3	1	NA	NA	1	NA	NA	4	4	4	4	4	4	4	4	3	4	4	4	4	4	NA	4		1	3	3	3	3	3	3	3	3	NA	1	2	3
53	50	F	1	26	0	PRIVATE	METRO	1	2	3	2	5	2	1	1	1	1	1	1	1	3	3	3	4	4	3	NA	3	3	3	4	3	3	NA	4		3	1	2	2	2	2	3	NA	2	3	3	1	2
54	34	M	1	10	0	PRIVATE	METRO	1	2	1	1	5	2	1	1	1	1	1	1	3	3	3	3	3	3	3	3	3	3	3	3	3	3	3	3		3	1	1	1	1	1	1	1	1	1	3	1	1
55	36	M	2	12	0	PRIVATE	METRO	1	2	3	2	5	2	1	1	1	1	1	1	3	3	3	3	3	3	3	3	3	3	3	3	3	3	3	3		3	1	1	1	1	1	1	1	1	1	3	1	1
56	33	F	1	3	0	PRIVATE	METRO	1	2	3	2	5	2	1	1	1	1	1	1	3	3	3	3	3	3	3	3	3	3	3	3	3	3	3	3		3	1	1	1	1	1	1	1	1	1	3	2	1
57	33	F	1	3	0	PRIVATE	METRO	1	2	3	2	5	2	1	1	1	1	1	1	3	3	3	3	3	3	3	3	3	3	3	3	3	3	3	3		3	1	1	1	1	1	1	1	1	1	3	1	1
58	54	F	2	24	0	PRIVATE	REGIONAL	1	2	2	1	5	1	1	1	1	1	1	1	3	3	3	3	3	3	3	3	3	3	3	3	3	3	3	3		3	1	1	1	1	1	1	1	1	1	3	1	1
59	37	F	2	7	0	PRIVATE	REGIONAL	1	1	NA	2	5	1	1	2	1	1	1	1	3	3	3	3	3	3	3	3	2	3	2	2	1	2	1	1	1	1	1	1	3	2	1	2	2	3	NA	2	1	2
60	24	F	1	1	0	PRIVATE	REGIONAL	1	1	NA	2	5	1	1	2	1	1	1	1	3	3	3	3	3	3	3	3	3	3	2	2	2	2	1	1	1	1	1	3	2	1	2	2	3	1	NA	2	1	2
61	52	F	2	26	0	PRIVATE	REGIONAL	2	1	1	1,2	5	1,2	1	2	1	1	1	1	3	3	3	3	3	3	3	3	3	3	3	3	3	2	1	1	1	1	2	1	2	1	2	2	2	2	1	NA	2	1
65	25	F	1	2	0	PRIVATE	REGIONAL	1	2	1	1,2	5	1,2,3	2	3	1	2	1	1	4	4	2	4	2	3	3	2	3	2	4	3	4	3	3	2	1	1	1	3	3	2	2	3	3	2	1	4	1	1
66	26	F	1	3	0	PRIVATE	REGIONAL	1	1	2	3	5	2,3	2	3	1	3	1	1	3	4	3	4	1	4	4	3	4	4	2	2	3	4	3	2	1	1	1	3	3	2	2	3	3	2	3	2	1	1
67	25	F	1	2	0	PRIVATE	REGIONAL	1	1	2	2	5	3	2	3	1	2	1	1	3	4	3	4	2	2	4	3	3	4	3	2	4	3	3	2	1	1	1	3	2	3	2	2	1	2	1	4	1	1
68	38	F	1	12	0	PRIVATE	REGIONAL	1	1	2	2,3	5	1,2,3	NA	NA	1	NA	NA	1	3	3	3	3	4	3	4	3	3	4	3	2	3	2	2	2		1	1	NA	1	1	NA	NA	NA	NA	NA	3	1	NA
69	35	F	1	11	0	PRIVATE	REGIONAL	1	1	2	2,3	5	1,2,3	NA	NA	1	NA	NA	1	3	3	3	3	NA	3	4	3	4	4	3	3	3	3	2	3		1	1	NA	1	1	NA	NA	NA	NA	NA	3	1	NA
70	35	F	1	10	0	PRIVATE	REGIONAL	3	1	2	3	5	3	2	2	2	2	2	2	4	4	4	4	4	4	4	4	4	4	4	4	4	4	4	4	1	4	1	1	1	NA	NA	NA	NA	NA	NA	3	1	NA
71	33	F	2	10	0	PRIVATE	REGIONAL	1	1	2	1,2	5	1,2,3	NA	NA	1	NA	NA	1	4	4	3	3	3	3	3	NA	3	3	4	3	3	3	3	3		1	NA	NA	1	1	1	NA	NA	NA	NA	2	2	NA
72	53	F	2	28	0	PRIVATE	REGIONAL	1	1	3	2	5	4	1	NA	NA	1	NA	NA	3	3	3	2	3	4	3	3	3	3	3	NA	3	2	NA	3		4	3	2	1	1	1	3	3	NA	2	2	1	NA
73	34	F	2	8	0	PRIVATE	REGIONAL	1	1	3	2	6	3	2	NA	NA	1	NA	NA	3	3	2	3	2	3	3	4	3	3	3	3	3	3	4	3		3	2	2	2	2	2	3	3	1	NA	3	2	2
74	30	F	2	1	0	PRIVATE	REGIONAL	2	1	3	1	5	1	NA	NA	1	NA	1	NA	1	NA	3	3	3	3	1	3	1	1	NA	NA	NA	1	NA	1		NA	1	NA	2	2	2	1	NA	NA	NA	2	2	1
75	50	F	2	27	25	PRIVATE	REGIONAL	1	1	2	1	5	1,2	1	2	1	1	2	1	4	1	4	1	3	1	4	1	2	1	2	2	3	3	2	2	4	4	2	2	2	2	2	3	3	3	NA	4	2	2
76	34	F	1	13	5	PRIVATE	NA	3	1	3	2	5	2,3	1	2	1	NA	2	1	4	4	3	4	4	4	4	4	4	4	4	3	4	3	3	3	1	1	2	2	2	1	2	2	3	2	2	3	2	2
77	38	F	1	16	0	PRIVATE	REGIONAL	1	1	3	2	1	2	NA	NA	1	NA	NA	1	3	3	2	3	3	3	NA	3	3	3	2	2	2	2	NA	2		1	2	3	3	3	3	3	NA	2	NA	2	1	2
78	32	F	NA	1	1	PRIVATE	NA	NA	1	3	NA	3	2	NA	2	NA	NA	NA	3	4	3	4	3	3	3	4	4	3	3	2	3	3	3	2	2	2	2	2	2	2	2	2	2	2	2	2	3	2	2
79	24	F	1	2	0	PRIVATE	REGIONAL	1	1	3	1	3	3	1	1	1	1	1	1	4	4	4	4	4	4	4	4	4	4	4	4	4	4	4	4	4	4	1	NA	1	NA	1	NA	NA	NA	NA	4	1	1
80	29	F	2	7	0	PRIVATE	REGIONAL	1	1	3	1	5	3	1	1	1	1	1	1	1	4	2	3	1	4	1	4	1	4	2	4	2	4	2	2	2	4	1	NA	1	NA	1	NA	NA	NA	NA	4	1	1
81	28	F	1	NA	0	PRIVATE	REGIONAL	1	1	3	3	3	3	1	1	1	1	1	1	1	1	2	1	1	2	2	1	1	1	1	2	2	1	2	2	2	1	1	1	1	NA	1	NA	NA	NA	NA	4	1	1
82	24	F	1	1	1	PRIVATE	REGIONAL	1	1	3	2	5	2,3	1	3	2	NA	1	2	3	3	3	3	3	3	NA	3	3	3	1	3	2	3	2	3	2	2	1	2	1	1	3	3	3	3	NA	3	2	2
83	41	F	1	18	0	PRIVATE	REGIONAL	1	1	1	3	1	3	3	1	1	1	1	1	1	3	4	4	4	4	4	4	4	4	4	4	4	4	4	4	4	4	1	NA	NA	1	1	NA	NA	NA	NA	3	1	1
84	27	F	1	8	0	PRIVATE	REGIONAL	1	1	3	3	3	3	1	1	1	1	1	1	1	1	NA	NA	1	1	NA	NA	1	1	NA	NA	NA	NA	NA	NA	1	NA	1	NA	1	1	1	1	NA	3	NA	2	1	1
85	31	F	2	7	0	PRIVATE	REGIONAL	1	1	3	1	3	3	1	1	1	1	1	1	4	4	4	4	4	4	4	4	4	4	4	4	4	4	4	4	4	4	1	NA	1	NA	1	NA	NA	NA	NA	1	1	1
86	22	F	1	1	0	PRIVATE	NA	1	1	NA	2	5	1,2	1	1	1	1	1	1	3	4	3	4	4	4	4	4	4	4	4	4	4	4	4	4	4	4	1	NA	1	NA	1	NA	NA	NA	NA	4	1	1
87	32	F	1	10	0	PRIVATE	REGIONAL	1	1	3	3	3	3	1	1	1	1	1	1	1	1	NA	NA	1	1	NA	NA	1	1	NA	NA	NA	NA	NA	NA	1	NA	1	NA	1	1	1	NA	NA	NA	NA	2	NA	1
88	23	F	1	1	0	PRIVATE	METRO	1	1	3	2	5	1,2	1	1	1	1	1	1	3	4	3	4	4	4	4	4	4	4	4	4	4	4	4	4	4	4	1	NA	1	NA	1	NA	NA	NA	NA	4	1	1
89	30	F	1	5	5	PRIVATE	REGIONAL	1	1	3	2	3	1	NA	1	1	1	1	1	1	4	4	2	3	2	3	3	3	3	NA	2	2	2	2	2	2	2	2	1	2	1	2	2	2	2	NA	3	2	2
90		F	NA	NA	0	NA	NA	3	1	3	1,2,3	3	1,2,3	1	3	2	2	2	2	3	3	3	3	3	3	3	3	3	3	3	3	3	3	3	3	3	3	2	2	2	2	2	2	2	2	2	3	1	2
91	41	F	1	16	6	PRIVATE	METRO	3	1	3	1,2	5	1,2	3	3	3	3	3	3	3	3	3	3	3	3	3	3	3	3	3	3	3	3	3	3	3	3	2	2	2	2	2	2	2	2	2	3	1	2
92	34	F	NA	13	1	PRIVATE	METRO	3	1	2	1,2	5	1,2	3	3	3	3	3	3	3	3	3	3	3	3	3	3	3	3	3	3	3	3	3	3	3	3	2	2	2	2	2	2	2	2	2	3	1	2
93	40	F	2	13	0	PRIVATE	REGIONAL	1	1	3	1	3	2	NA	2	NA	1	NA	NA	3	3	3	3	3	3	3	3	3	3	3	3	3	3	3	3	3	1	NA	2	NA	1	NA	3	NA	NA	NA	3	1	2
94	24	F	2	NA	0	PRIVATE	RURAL	2	1	1	3	5	3	1	1	1	1	1	1	3	3	3	3	3	3	3	3	3	3	3	3	3	3	3	3	3	3	2	2	2	2	2	2	2	2	2	2	1	2
95	28	F	1	8	0	PRIVATE	RURAL	1	1	1	3	5	3	1	1	1	1	1	1	3	3	3	3	3	3	3	3	3	3	3	3	3	3	3	3	3	3	2	2	2	2	2	2	2	2	2	3	1	2
96	29	F	1	8	8	PRIVATE	RURAL	1	1	1	2	5	2,3	NA	NA	1	NA	NA	1	3	3	3	3	3	3	3	3	3	4	2	2	2	3	3	2	2	2	2	2	2	1	2	3	3	1	NA	3	1	2
97	29	F	1	1	0	PRIVATE	RURAL	1	1	1	2	5	3	NA	NA	3	NA	NA	3	4	3	4	3	4	3	4	3	4	4	3	2	3	3	4	2	2	2	2	2	2	1	2	3	3	1	NA	3	1	2
98	22	F	2	NA	0	PRIVATE	RURAL	1	1	1	3	5	3	1	1	1	1	1	1	3	3	3	3	3	3	3	3	3	3	3	3	3	3	NA	3		3	2	2	2	2	2	2	2	2	2	3	NA	2
99	24	F	1	3	3	PRIVATE	RURAL	1	1	1	2	5	4	NA	NA	1	NA	NA	1	4	3	4	3	4	3	4	3	4	4	3	2	3	4	4	2	2	2	2	2	2	1	2	3	3	1	NA	3	1	2
100	29	F	1	4	4	PRIVATE	RURAL	1	1	1	2	5	3	NA	NA	1	NA	NA	1	4	3	4	3	4	3	4	3	4	4	3	2	3	3	4	2	3	2	2	2	2	1	2	3	3	1	NA	3	1	2
101	23	F	1	3	0	PRIVATE	REGIONAL	3	1	3	1	5	1	NA	NA	1	NA	1	NA	3	3	3	2	3	2	4	3	3	3	2	2	2	2	2	2	3	3	2	2	NA	1	NA	NA	NA	NA	NA	1	1	2
102	22	F	2	2	0	PRIVATE	REGIONAL	2	1	3	3	5	3	2	2	2	2	2	2	3	3	3	2	2	3	3	3	3	3	3	3	3	3	3	3	2	2	2	2	1	1	NA	2	2	3	2	1	1	1
103	46	F	2	25	5	PRIVATE	REGIONAL	1	1	3	1	5	1	1	1	1	1	2	2	3	3	3	3	3	3	3	3	3	3	3	3	3	3	3	3	3	3	NA	2	2	2	2	NA	NA	NA	NA	2	1	NA
104	23	F	2	1	0	PRIVATE	REGIONAL	1	1	3	1	5	1	1	NA	NA	1	NA	NA	3	3	3	3	2	3	3	3	3	3	2	2	3	3	2	2	1	1	NA	NA	1	1	NA	NA	1	NA	NA	3	1	NA
105	23	F	1	1	0	PRIVATE	REGIONAL	1	1	2	1	5	1	1	NA	NA	1	NA	NA	3	3	2	3	2	3	3	2	3	3	2	2	3	3	2	2	1	1	NA	NA	1	1	NA	NA	1	NA	NA	3	1	NA
106	41	F	2	15	0	PRIVATE	REGIONAL	1	1	2	1	5	1	1	NA	NA	1	NA	NA	3	3	3	2	3	2	3	3	3	2	3	3	2	2	2	2		2	2	2	2	2	2	2	2	2	2	2	1	1
107	39	M	1	11	0	PRIVATE	NA	3	2	1	1,2,3	5	1,2,3	1	NA	3	1	NA	3	3	3	3	3	2	2	3	3	3	3	3	3	3	3	3	NA		NA	2	1	2	3	3	3	3	3	NA	2	2	2
108	42	F	NA	15	0	PRIVATE	NA	3	2	1	1,2,3	5	1,2,3	1	2	3	1	2	3	3	3	3	3	2	3	3	3	3	3	3	3	3	3	1	3	1	2	2	1	2	3	3	3	3	3	3	2	2	2
109	43	M	2	13	0	PRIVATE	REGIONAL	1	1	3	1	5	1	1	1	1	1	2	2	3	3	3	3	3	3	3	3	3	3	3	3	3	3	3	3	3	3	NA	2	2	2	2	NA	NA	NA	NA	2	1	NA
110	33	F	1	10	0	PRIVATE	REGIONAL	NA	1	3	1	5	1	1	1	1	1	1	1	3	3	3	3	3	3	3	3	3	3	3	3	3	3	3	3	3	3	2	2	2	2	2	2	2	2	2	2	1	2
111	45	F	2	21	0	PRIVATE	REGIONAL	1	1	3	1	5	1	1	1	1	1	1	1	3	3	3	3	3	3	3	3	3	3	3	3	3	3	3	3	3	3	2	2	2	2	2	2	NA	2	2	2	2	2
112	30	F	2	8	0	PRIVATE	REGIONAL	1	1	3	1,2,3	3	1,2,3	1	1	1	1	1	1	3	3	3	3	3	3	3	3	3	3	3	3	3	3	3	3	2	2	NA	2	2	2	NA	NA	NA	NA	NA	2	1	NA
113	23	F	2	1	0	PRIVATE	REGIONAL	1	1	3	1,2,3	3	1,2,3	1	1	1	1	1	1	3	3	3	3	3	3	3	3	3	3	3	3	3	3	3	3	2	2	NA	1	1	1	NA	NA	NA	NA	NA	NA	2	2
114	25	F	1	3	0	PRIVATE	REGIONAL	1	1	3	1,2	5	1,2,3	1	1	1	1	1	1	3	3	3	3	3	3	3	3	3	3	3	3	3	3	3	3	2	2	NA	1	1	NA	1	NA	NA	NA	NA	2	2	NA
115	47	F	1	20	0	PRIVATE	RURAL	3	1	5	1	5	1	NA	NA	1	NA	1	NA	3	3	1	2	1	2	3	3	1	3	1	2	2	2	2	2	3	3	2	2	NA	NA	1	NA	NA	NA	NA	1	1	2
116	24	F	1	2	0	PRIVATE	REGIONAL	3	1	3	1	5	1	NA	NA	1	NA	1	NA	3	3	3	2	3	2	4	3	3	3	2	2	2	2	2	2	3	3	2	2	2	NA	NA	NA	NA	NA	NA	1	1	2
117	25	F	1	3	0	PRIVATE	REGIONAL	2	1	3	1	5	1	NA	NA	1	NA	1	NA	3	3	3	2	3	2	4	3	3	3	2	2	2	2	3	2	3	3	2	2	NA	2	NA	NA	NA	NA	NA	1	1	2
118	28	F	2	1	0	PRIVATE	REGIONAL	1	2	3	1	5	1	NA	NA	1	NA	1	NA	3	3	3	2	3	2	4	3	3	3	2	2	2	2	2	2	3	3	2	2	2	NA	NA	NA	NA	NA	NA	1	2	2
119	25	F	1	3	0	PRIVATE	REGIONAL	3	1	3	1	5	1	NA	NA	1	NA	1	NA	3	3	3	2	3	2	4	3	3	3	2	2	2	2	2	2	3	3	2	2	2	NA	NA	NA	NA	NA	NA	1	1	2
120	25	F	2	1	0	PRIVATE	REGIONAL	2	1	3	1	5	1	NA	NA	1	NA	1	NA	3	3	3	2	3	2	4	3	3	3	2	2	2	2	2	2	3	3	2	2	2	NA	NA	NA	NA	NA	NA	1	1	2
121	24	F	1	3	0	PRIVATE	METRO	1	1	3	3	5	3	2	3	2	1	1	1	3	4	3	4	3	3	4	3	4	3	2	2	2	2	2	2	1	1	1	3	2	NA	NA	NA	NA	NA	NA	3	2	2
122	24	F	1	3	0	PRIVATE	METRO	1	1	3	3	3	1	2	3	2	1	1	1	3	4	3	4	3	3	4	3	4	3	2	2	2	2	2	2	1	1	1	3	2	NA	NA	NA	NA	NA	NA	3	2	2
123	25	F	2	2	0	PRIVATE	REGIONAL	NA	1	3	1	5	1,2,3	1	1	1	1	1	1	3	3	3	3	3	3	3	3	3	3	3	3	3	3	3	3	2	2	NA	1	1	NA	1	NA	NA	NA	NA	2	2	NA
124	23	F	1	3	0	PRIVATE	REGIONAL	1	NA	3	1	5	1,3	1	1	1	1	1	1	3	3	3	3	3	3	3	3	3	3	3	3	3	3	3	3	2	2	NA	1	1	NA	1	NA	NA	NA	NA	2	2	NA
125	30	F	2	10	0	PRIVATE	REGIONAL	1	NA	3	1,2	5	1,2,3	1	1	1	1	1	1	3	3	3	3	3	3	3	3	3	3	3	3	3	3	3	3	2	2	NA	1	1	NA	1	NA	NA	NA	NA	2	2	NA
126		F	1	10	0	PRIVATE	METRO	1	1	3	3	5	3	2	3	2	1	1	1	3	4	3	4	3	3	4	3	4	3	2	2	2	2	2	2	1	1	1	3	2	NA	NA	NA	NA	NA	NA	3	2	2
127	35	F	2	11	0	PRIVATE	REGIONAL	1	1	3	1	5	1,3	1	1	1	1	1	1	3	3	3	3	3	3	3	3	3	3	3	3	3	3	3	3	2	2	1	1	1	1	NA	na	na	na	na	2	2	NA
128		F	2	15	0	PRIVATE	REGIONAL	1	1	3	1,2	5	1,2,3	1	1	1	1	1	1	3	3	3	3	3	3	3	3	3	3	3	3	3	3	3	3	2	1	NA	1	1	1	NA	NA	NA	NA	NA	NA	2	1
129	40	F	2	20	0	PRIVATE	REGIONAL	1	1	3	1,2	5	1,2,3	1	1	1	1	1	1	3	3	3	3	3	3	3	3	3	3	3	3	3	3	3	3	2	2	NA	1	1	1	NA	NA	NA	NA	NA	1	2	NA
130	55	F	2	29	0	PRIVATE	REGIONAL	1	1	3	1,2	5	1,2,3	1	1	1	1	1	1	3	3	3	2	3	2	3	4	3	4	3	4	3	4	3	4	3	4	1	1	2	1	3	3	3	2	NA	2	2	3
131	46	F	2	25	0	PRIVATE	REGIONAL	1	1	3	1	5	1	1	2	1	1	1	1	3	3	4	4	3	4	3	3	3	4	2	3	4	4	2	2	1	1	1	1	2	3	3	2	3	3	NA	3	2	2
133	45	F	2	20	0	NA	REGIONAL	1	1	3	1	5	1	1	2	1	1	1	1	3	3	4	4	2	4	3	3	3	4	2	2	4	3	2	3	1	1	1	1	2	3	3	2	3	3	NA	3	1	2
134	32	F	2	13	0	PRIVATE	REGIONAL	1	1	3	1	5	1	1	2	1	1	1	1	3	3	4	4	3	4	4	3	2	4	3	2	2	2	3	2	1	2	1	1	2	3	3	2	3	3	NA	3	1	2
135	29	F	1	5	0	PRIVATE	REGIONAL	1	1	3	1	5	1	1	2	1	1	1	1	3	3	4	4	3	4	4	3	2	3	2	3	4	3	2	4	1	3	1	1	2	3	3	2	NA	3	NA	3	1	2
136	48	F	1	20	0	PRIVATE	REGIONAL	1	1	3	1	5	1	1	2	1	1	1	1	3	3	4	4	3	4	3	3	3	4	2	2	4	3	2	2	1	NA	1	1	2	3	3	2	3	3	NA	3	1	2
137	44	F	2	25	0	PRIVATE	REGIONAL	1	1	3	1	5	1	1	2	1	1	1	1	3	3	4	4	3	4	3	3	3	4	3	3	2	4	4	3	2	1	1	1	2	3	3	2	3	3	NA	3	1	2
138	23	F	1	1	0	PRIVATE	REGIONAL	2	2	2	2	5	1,2	2	3	1	1	2	1	4	4	3	3	1	2	3	4	4	NA	3	NA	4	NA	3	NA	1	NA	2	3	2	3	3	2	3	2	3	4	1	2
139	30	F	2	12	0	PRIVATE	RURAL	1	1	3	3	5	3	NA	2	1	NA	2	1	1	1	1	1	1	1	1	1	1	1	1	1	1	1	1	1	4	4	2	1	2	1	2	3	3	3	NA	3	1	2
140	22	F	1	1	0	NA	RURAL	1	1	3	3	5	NA	2	1	NA	2	1	1	1	1	1	1	1	1	1	1	1	1	1	1	1	1	1	1	4	4	2	1	2	1	2	3	3	3	NA	3	2	1
141	22	F	2	2	0	NA	RURAL	1	1	3	3	5	3	NA	2	1	NA	2	1	1	1	1	1	1	1	1	1	1	1	1	1	1	1	1	1	4	4	2	1	2	1	2	3	3	3	NA	3	1	2
142	24	F	1	3	0	NA	RURAL	1	1	3	3	5	3	NA	2	1	NA	2	1	1	1	1	1	1	2	1	2	1	3	1	1	1	2	1	1		4	2	1	2	1	2	3	3	3	NA	3	1	2
143	28	F	2	5	0	NA	RURAL	1	2	1	3	1	NA	1	NA	NA	1	NA	1	3	3	3	2	4	2	3	3	3	3	2	NA	2	2	2	2	3	2	2	2	NA	2	NA	NA	NA	NA	NA	1	1	2
144	34	F	2	9	0	PRIVATE	RURAL	2	1	1	3	5	3	1	1	1	1	1	1	3	3	3	3	3	3	3	3	3	3	3	3	3	3	3	3	3	3	2	2	2	2	2	2	2	2	2	3	1	2
145	35	F	1	11	0	PRIVATE	RURAL	3	1	1	3	5	1	1	1	1	1	1	1	3	3	3	3	3	3	3	3	3	3	3	3	3	3	3	3	3	3	2	2	2	2	2	2	2	2	2	3	1	2
146	23	F	2	NA	0	PRIVATE	RURAL	2	1	1	3	5	3	1	1	1	1	1	1	3	3	3	3	3	3	3	3	3	3	3	3	3	3	3	3	3	3	2	2	2	2	2	2	2	2	2	3	1	2
147	41	F	2	18	2	PRIVATE	RURAL	1	1	1	3	5	3	1	1	1	1	1	1	3	3	3	3	3	3	3	3	3	3	3	3	3	3	3	3	3	3	2	2	2	2	2	2	2	2	2	3	1	2
148	34	F	2	8	0	PRIVATE	RURAL	2	1	1	3	5	3	1	1	1	1	1	1	3	3	3	3	3	3	3	3	3	3	3	3	3	3	3	3	3	3	2	2	2	2	2	2	2	2	2	3	2	2
149	31	F	2	10	0	PRIVATE	RURAL	2	1	1	3	5	1	1	1	1	1	1	1	3	3	3	3	3	3	3	3	3	3	3	3	3	3	3	3	3	3	2	2	2	2	2	2	2	2	2	3	NA	2
150	40	F	1	18	2	PRIVATE	REGIONAL	1	1	2	1	5	2	NA	NA	1	NA	1	NA	4	3	3	3	3	3	3	3	3	3	3	3	3	3	3	3	3	3	2	3	2	1	2	2	2	2	2	4	1	2
151	23	F	1	6	0	PRIVATE	REGIONAL	NA	1	3	2,3	5	NA	2	2	1	1	1	1	3	3	3	3	4	3	4	3	4	3	3	3	3	3	3	3	3	3	2	2	2	2	2	2	2	2	2	2	2	2
152	22	F	2	2	0	NA	REGIONAL	1	1	3	2	5	2	1	1	1	1	1	1	3	3	3	3	3	3	3	4	3	4	3	3	3	3	1	3	1	3	1	1	1	1	1	1	1	1	1	3	1	1
153	22	F	2	2	0	PRIVATE	REGIONAL	1	1	3	2	5	3	1	1	1	1	1	1	3	3	3	3	3	3	3	3	3	3	3	3	3	3	3	3	3	3	1	1	2	2	2	1	2	2	NA	3	1	1
154	32	F	1	8	0	PRIVATE	REGIONAL	1	1	3	2,3	5	1,2,3	2	2	1	1	1	1	3	3	3	4	4	4	4	4	3	3	2	2	3	2	2	2	2	2	2	2	2	2	2	2	2	2	2	2	1	2
155	28	F	2	6	0	PRIVATE	REGIONAL	1	1	3	1,2	1	1	1	2	1	1	1	3	3	3	3	3	3	3	3	3	3	3	3	3	3	3	NA	3		3	1	3	1	2	2	2	2	2	2	3	2	2
156	26	F	1	2	0	PRIVATE	REGIONAL	1	1	3	1,3	3	1,2,3	2	2	1	1	1	1	3	3	3	3	3	3	3	3	3	3	3	3	3	3	3	3	3	3	2	1	2	2	2	3	3	3	NA	3	1	3
157	34	F	2	12	0	PRIVATE	REGIONAL	1	1	2	2,3	5	3	2	2	1	1	1	1	3	3	3	3	4	3	4	3	4	4	3	2	3	2	2	2	2	2	2	2	2	2	3	2	2	2	2	2	1	2
158	23	F	1	1	0	PRIVATE	REGIONAL	1	2	3	1	5	1	1	1	1	1	1	1	3	3	3	3	3	3	3	3	3	3	3	3	3	3	3	3	3	3	1	1	2	2	2	1	3	3	NA	3	1	1
159	49	F	2	21	0	PRIVATE	REGIONAL	1	1	3	2	5	3	1	1	1	1	1	1	3	3	3	3	3	3	3	3	3	3	3	3	3	3	3	3	3	3	1	1	2	2	2	1	2	2	NA	3	1	1
160	25	F	1	3	0	PRIVATE	REGIONAL	1	1	3	2	5	3	1	1	1	1	1	1	3	3	3	3	3	3	3	3	3	3	3	3	3	3	3	3	3	3	1	1	2	2	2	1	2	2	NA	3	1	1
161	30	F	2	9	0	PRIVATE	REGIONAL	1	2	3	2	5	3	1	1	1	1	1	1	3	3	3	3	3	3	3	3	3	3	3	3	3	3	3	3	3	3	1	1	2	2	2	1	2	2	NA	3	1	1
162	38	F	1	10	0	PRIVATE	METRO	1	1	3	3	5	2	1	NA	NA	NA	NA	NA	3	3	3	3	3	3	3	3	3	3	3	3	3	3	3	3	2	2	1	2	1	1	1	1	1	1	1	3	1	1
163	35	F	2	15	0	PRIVATE	METRO	1	1	3	3	5	2,3	1	1	1	1	1	1	3	3	3	3	3	3	3	3	3	3	3	3	3	3	3	3	2	2	1	2	1	1	1	1	1	1	1	3	1	1
164	38	F	2	19	0	PRIVATE	REGIONAL	1	1	3	2	5	3	1	1	1	1	1	1	4	3	3	4	4	4	3	4	3	3	4	3	3	3	3	3	3	3	2	2	2	1	NA	1	1	1	NA	3	1	1
165	40	F	2	13	0	PRIVATE	REGIONAL	1	1	3	2	5	3	1	1	1	1	1	1	4	3	3	3	3	3	3	3	3	3	3	3	3	3	3	3	3	3	2	2	2	2	2	2	2	2	2	3	1	1
166	37	M	2	13	0	PRIVATE	REGIONAL	1	1	3	2	5	3	1	1	1	1	1	1	4	3	3	4	4	4	3	4	3	3	4	3	3	3	3	3	3	3	2	2	2	1	1	1	1	1	NA	3	1	1
167	37	F	2	13	2	PRIVATE	REGIONAL	1	1	2	2	5	1	1	1	1	1	1	1	3	3	3	3	3	3	3	3	3	3	3	3	3	3	3	3	3	3	2	2	2	1	1	1	2	2	2	3	1	2
168	22	F	2	2	0	PRIVATE	REGIONAL	1	1	3	2	5	3	1	1	1	1	1	1	3	3	3	3	3	3	3	3	3	3	3	3	3	3	NA	3		3	2	1	2	1	2	2	2	2	2	3	2	2
169	26	F	2	4	0	PRIVATE	REGIONAL	1	1	3	2	5	3	1	1	1	1	1	1	3	3	3	3	3	3	3	3	3	3	3	3	3	3	3	3	3	3	3	3	1	1	1	1	1	1	1	3	1	1
170	38	F	1	12	0	PRIVATE	REGIONAL	1	1	3	2,3	5	2,3	1	1	1	2	2	2	3	3	4	4	4	4	4	4	4	4	4	4	4	4	4	4	4	4	1	1	NA	NA	1	NA	NA	NA	NA	3	1	1
171	24	F	1	2	0	PRIVATE	REGIONAL	1	1	3	2	5	2	1	1	1	1	1	1	3	3	3	3	3	3	3	3	3	3	3	3	3	3	3	3	3	3	1	1	2	1	2	2	2	2	2	3	2	2
172	31	F	2	8	0	PRIVATE	REGIONAL	1	1	3	2,3	5	1,2,3	1	NA	NA	1	NA	NA	3	3	3	3	3	3	3	3	3	3	3	3	2	3	3	3	3	3	1	1	1	NA	NA	NA	NA	NA	NA	2	2	1
173	32	F	1	10	0	PRIVATE	REGIONAL	1	1	2	2,3	3	1,2,3	1	1	1	1	1	1	3	3	3	3	4	2	3	3	4	3	2	3	2	2	2	2	2	2	1	3	2	NA	NA	NA	NA	NA	NA	2	2	1
174	22	F	2	1	0	PRIVATE	REGIONAL	1	1	3	1,2	3	1,2,3	1	1	1	1	NA	1	3	NA	3	NA	3	NA	3	NA	4	NA	4	NA	4	NA	3	NA	1	NA	1	NA	NA	1	NA	NA	1	NA	NA	2	2	1
175	30	F	2	7	0	PRIVATE	REGIONAL	1	1	2	2	5	2,3	1	NA	NA	1	NA	NA	3	3	3	3	2	3	3	3	3	3	3	3	2	3	3	3	3	3	1	1	NA	1	NA	NA	NA	NA	NA	2	1	1
176	30	F	1	6	0	PRIVATE	REGIONAL	1	1	2	2,3	5	1,2,3	1	1	1	1	1	1	3	4	3	3	4	2	3	3	4	3	2	2	2	2	2	2	2	2	1	3	2	NA	NA	NA	NA	NA	NA	2	2	1
177	30	F	1	7	0	PRIVATE	REGIONAL	1	1	3	2,3	5	1,2,3	1	NA	NA	1	NA	NA	3	3	3	3	3	3	3	3	3	3	3	3	2	3	3	3	3	3	1	1	1	NA	NA	NA	NA	NA	NA	2	1	1
178	22	F	2	1	0	PRIVATE	REGIONAL	1	1	3	2,3	5	1,2,3	1	NA	NA	1	NA	NA	3	3	3	3	3	2	3	3	3	3	2	4	2	4	3	4	3	3	1	1	1	NA	NA	NA	NA	NA	NA	2	1	2
179	34	F	2	6	0	PRIVATE	REGIONAL	1	1	3	1,2	5	1,2,3	1	1	1	1	1	1	3	3	3	4	3	3	3	4	3	4	3	3	3	3	3	3	3	2	2	2	2	1	1	1	2	2	NA	3	1	2
180	24	F	1	1	0	PRIVATE	REGIONAL	1	1	2	2	5	2,3	3	2	1	3	2	1	3	3	3	3	2	2	3	3	3	3	2	3	2	3	3	2	2	2	3	3	2	3	3	3	3	3	3	3	1	3
181	30	F	2	8	0	PRIVATE	REGIONAL	1	2	2	2	5	1,2,3	1	2	1	1	1	1	3	3	3	3	3	3	3	3	3	3	3	3	3	3	3	3	2	3	2	1	2	3	3	3	NA	3	NA	2	2	2
182	23	F	1	3	0	PRIVATE	REGIONAL	1	1	2	1,2	5	3	2	1	1	2	1	1	3	3	3	3	3	3	4	4	3	4	3	3	4	3	3	3	2	3	2	1	2	3	3	3	NA	NA	NA	2	2	2
183	23	F	1	3	0	PRIVATE	REGIONAL	1	2	2	1,2	5	1,2,3	NA	NA	3	NA	NA	3	3	4	3	4	4	4	4	3	4	4	2	3	4	4	4	3	1	1	1	1	2	NA	NA	NA	NA	NA	NA	1	1	NA
184	36	F	2	13	0	PRIVATE	REGIONAL	1	2	2	1	5	2	NA	NA	3	NA	NA	3	3	4	3	3	4	3	4	4	4	4	3	3	4	4	4	4	1	1	1	1	2	2	2	2	1	2	2	1	1	1
185	33	F	1	8	0	PRIVATE	REGIONAL	1	1	3	1,2,3	5	1,2,3	1	2	2	1	1	1	3	3	3	3	3	3	3	3	3	3	2	3	2	3	NA	3		3	1	2	2	NA	NA	NA	NA	NA	NA	3	NA	1
186	27	F	2	5	0	PRIVATE	REGIONAL	1	1	3	2	5	1,2,3	1	NA	NA	1	1	1	3	3	3	3	3	3	3	3	3	3	3	3	3	3	2	3	2	3	1	2	2	NA	NA	NA	NA	NA	NA	2	2	1
187	30	F	1	8	0	PRIVATE	REGIONAL	1	1	3	1,2,3	5	1,2,3	1	2	2	1	1	1	3	3	3	3	3	3	3	3	3	3	2	3	2	3	NA	3		3	1	2	2	NA	NA	NA	NA	NA	NA	3	NA	1
188	48	F	1	21	0	PRIVATE	REGIONAL	1	1	3	1,2,3	5	1,2,3	1	NA	NA	1	1	1	4	3	3	3	3	3	3	3	3	3	3	3	3	3	2	3	2	3	1	2	2	NA	NA	NA	NA	NA	NA	2	2	1
190	40	F	2	6	0	PRIVATE	REGIONAL	1	1	3	2	5	1,2,3	1	1	1	1	1	1	3	3	3	3	3	3	3	3	3	3	3	3	3	3	2	3	2	3	1	2	2	NA	NA	NA	NA	NA	NA	2	2	1
191	27	F	1	5	0	PRIVATE	REGIONAL	1	1	3	NA	5	1,2,3	NA	NA	1	1	2	3	3	3	3	3	3	3	4	3	3	3	3	3	4	3	4	3	3	2	2	3	2	1	2	2	2	2	NA	2	2	2
192	36	F	2	10	0	PRIVATE	REGIONAL	1	1	3	2	5	1,2.3	NA	NA	2	NA	2	NA	3	3	3	3	3	3	4	3	4	3	4	3	4	3	3	3	3	3	2	2	2	NA	2	2	NA	NA	NA	2	2	2
193	32	F	2	13	0	PRIVATE	REGIONAL	1	1	3	2	5	2	NA	NA	1	NA	NA	1	3	3	3	3	3	3	4	3	3	3	4	3	4	3	3	3	2	2	2	3	2	1	2	1	2	2	NA	2	2	2
194	31	F	2	9	0	PRIVATE	REGIONAL	1	1	3	2	5	1,2,3	NA	NA	1	1	NA	NA	3	3	3	3	3	3	4	NA	3		NA	3	4	3	3	3	3	NA	2	3	2	1	2	2	2	2	NA	2	2	2
195	27	F	2	7	0	PRIVATE	REGIONAL	1	1	3	2	5	2	NA	NA	1	NA	1	NA	3	3	3	3	3	3	4	3	2	3	3	3	3	3	3	3	3	2	2	3	2	1	2	2	2	2	2	2	2	2
196	24	F	1	2	0	PRIVATE	REGIONAL	1	1	3	2	5	2	NA	NA	1	NA	1	NA	3	3	3	3	3	3	4	3	3	3	4	3	4	3	3	3	3	3	2	3	2	1	2	2	2	2	NA	2	1	2
197	38	F	1	12	0	PRIVATE	REGIONAL	1	1	3	2,3	5	2,3	2	2	2	2	2	2	3	3	4	4	4	4	4	4	4	4	4	4	4	4	4	4	4	2	1	1	NA	NA	1	NA	NA	NA	NA	3	1	1
198	37	F	2	13	0	PRIVATE	REGIONAL	1	2	3	2	5	3	1	1	1	1	1	1	3	3	3	4	3	3	3	4	3	3	3	3	3	3	2	3	1	NA	2	2	2	1	1	1	2	1	NA	3	2	2
199	33	F	2	7	0	PRIVATE	METRO	1	2	3	2	5	1	1	1	1	1	1	1	4	3	3	3	4	3	3	3	3	3	3	4	3	4	3	2		1	2	2	2	1	1	1	1	1	1	3	2	3
200	40	F	2	13	0	PRIVATE	REGIONAL	2	2	2	2	5	2	1	1	1	1	1	1	4	2	3	2	3	2	3	3	3	3	3	3	3	3	3	3	3	NA	2	1	1	1	1	1	1	1	NA	3	2	1
201	21	F	2	NA	0	PRIVATE	REGIONAL	3	1	2	1	6	4	1	NA	NA	1	NA	NA	1	3	3	3	3	3	1	3	3	3	3	3	3	3	3	3	3	3	1	1	1	1	2	3	3	3	NA	3	2	1
203	53	F	2	31	0	PRIVATE	METRO	1	1	1	1,2	5	2	1	1	1	1	1	1	4	4	4	4	4	4	4	4	4	4	4	4	4	4	4	4	1	1	3	1	1	1	1	1	1	1	1	2	1	3
204	31	F	2	7	0	PRIVATE	REGIONAL	1	1	1	1,2	5	2	3	3	3	3	3	3	3	4	3	1	3	4	3	4	3	4	3	4	3	4	3	4	1	1	3	1	3	3	3	3	3	3	3	2	1	3
205	40	F	2	16	0	PRIVATE	METRO	1	1	1	1,2	5	2	1	1	1	1	1	1	4	4	4	4	4	4	4	4	4	4	4	4	4	4	4	4	1	1	3	1	3	3	3	3	3	3	NA	2	1	3
206	42	F	1	15	0	PRIVATE	REGIONAL	1	1	1	1,2	5	2	1	1	1	1	1	1	4	4	4	4	4	4	4	4	4	4	4	4	4	4	4	4	1	1	3	1	3	3	3	3	3	3	3	2	1	3
207	35	F	1	14	0	PRIVATE	METRO	1	NA	2	1,3	5	2	1	2	1	1	1	1	3	3	3	3	3	3	3	3	3	3	3	3	3	3	3	3	1	1	3	3	3	3	3	3	3	3	3	3	1	3
208	44	F	1	11	0	PRIVATE	REGIONAL	1	1	2	2	5	2	1	1	1	1	1	1	3	3	3	3	3	3	3	3	3	3	3	3	3	3	3	3	2	3	2	2	2	3	3	3	3	3	3	3	1	3
209	54	F	2	29	0	PRIVATE	RURAL	1	1	2	2	5	3	1	1	1	1	1	1	4	4	4	4	4	4	4	4	4	4	4	4	4	4	4	4	1	1	3	1	3	3	3	3	3	3	NA	2	1	3
211	56	F	1	30	0	PRIVATE	METRO	1	1	1	1,2	5	2	1	1	1	1	1	1	4	4	4	4	4	4	4	4	4	4	4	4	4	4	4	4	1	1	3	1	3	3	3	3	3	3	NA	2	1	3
212	35	F	1	12	0	PRIVATE	METRO	1	1	2	1,2,3	5	1,2,3	1	2	1	1	1	1	3	3	3	3	3	3	3	3	3	3	3	3	3	3	3	3	1	1	3	3	3	3	3	3	3	3	3	3	1	3
213	34	F	2	13	0	PRIVATE	REGIONAL	1	1	1	1	5	1	1	1	1	1	1	1	3	3	3	3	3	3	3	3	3	3	3	3	3	3	3	3		NA	1	1	1	1	1	1	1	1	1	2	1	1
214	31	F	1	11	0	PRIVATE	METRO	1	1	1	2	5	3	1	1	1	1	1	1	4	4	4	4	4	4	4	4	4	4	4	4	4	4	4	4	1	1	1	3	3	3	3	3	3	3	3	3	NA	3
215	48	F	1	18	0	PRIVATE	METRO	1	1	1	2	5	2	1	1	1	1	1	1	3	3	3	3	3	3	3	3	3	3	3	3	3	3	NA	3		NA	1	1	1	1	1	1	1	1	1	3	2	1
216	38	F	1	8	0	PRIVATE	METRO	1	1	1	2	5	1,2	1	1	1	1	1	1	3	3	3	3	3	3	3	3	3	3	3	3	3	3	3	3	3	3	NA	NA	1	1	1	NA	NA	NA	NA	3	2	NA
217	33	F	2	10	1	PRIVATE	REGIONAL	1	1	3	1	5	2	1	NA	NA	1	NA	NA	3	3	3	3	3	3	3	3	3	3	3	3	3	3	3	3	3	3	2	2	2	2	2	2	2	2	2	3	1	1
218	23	F	1	25	0	NA	RURAL	1	1	2	3	5	3	NA	3	NA	NA	3	NA	3	3	4	3	NA	1	4	3	3	3	3	3	3	3	3	3	3	3	3	3	3	3	3	3	3	3	3	4	1	3
219	36	F	1	8	3	PUBLIC	REGIONAL	2	1	1	1	5	2	1	NA	NA	1	NA	NA	3	3	3	3	3	3	3	3	3	3	3	3	3	3	3	3	3	3	1	1	1	1	1	1	1	1	1	2	1	1
220	31	F	2	5	3	PRIVATE	RURAL	1	1	2	1,2,3	5	1,2,3	1	1	1	1	1	1	1	1	1	1	1	1	1	1	1	1	1	1	1	1	NA	1		1	1	1	1	1	1	NA	NA	NA	NA	1	1	1
221	49	F	2	27	2	PRIVATE	RURAL	1	1	1	1,2,3	5	1,2,3	1	1	1	1	1	1	1	1	1	1	1	1	1	1	1	1	1	1	1	1	1	1	1	1	1	1	1	1	1	NA	NA	NA	NA	1	1	1
222	31	F	1	3	0	PRIVATE	RURAL	1	1	NA	3	5	3	1	NA	NA	1	NA	NA	1	1	1	1	1	1	1	1	1	1	1	1	1	1	1	1	1	1	1	1	1	1	1	1	1	1	1	1	1	1
223	23	F	1	1	1	PRIVATE	RURAL	1	1	2	1,2,3	5	1,2,3	1	1	1	1	1	1	1	1	1	1	1	1	1	1	1	1	1	1	1	1	1	1	1	1	1	1	1	1	NA	NA	NA	NA	NA	1	1	1
224	40	M	2	20	10	PRIVATE	RURAL	1	2	2	1	2	1	2	2	2	2	2	2	3	3	3	3	3	3	3	3	3	3	3	3	3	3	3	3		NA	2	2	2	2	2	2	2	2	2	3	2	2
225	50	F	2	29	0	PRIVATE	METRO	1	1	1	2	5	2	1	1	1	1	1	1	4	4	4	4	4	4	4	4	4	4	4	4	4	4	4	4	1	1	3	1	3	3	3	3	3	3	NA	2	1	3
226	54	F	2	30	0	PRIVATE	REGIONAL	1	1	1	1,2,3	5	2,3	1	1	1	1	1	1	3	3	3	3	3	3	3	3	3	3	2	3	3	3	NA	2		2	1	1	1	1	1	1	2	1	2	2	1	1
227	54	F	2	23	0	PRIVATE	REGIONAL	1	1	1	1,2,3	5	2,3	1	1	1	1	1	1	3	3	3	3	3	3	3	3	3	3	3	3	2	3	3	2	2	2	1	1	1	1	1	1	2	1	2	2	1	1
228	39	F	2	15	0	PRIVATE	METRO	1	1	1	1,2	5	2	1	1	1	1	1	1	4	4	4	4	4	4	4	4	4	4	4	4	4	4	4	4	1	1	3	1	3	3	3	3	3	NA	NA	2	1	3
229	30	F	2	9	0	PRIVATE	REGIONAL	1	1	2	1,2,3	5	2	1	1	1	1	1	1	3	3	3	3	3	3	3	3	3	3	3	3	3	3	3	3	1	1	1	3	1	1	3	3	3	3	3	2	1	1
230	40	F	1	10	0	PRIVATE	REGIONAL	1	1	2	3	5	3	NA	2	NA	NA	2	NA	3	3	3	3	3	3	3	3	3	3	3	3	3	3	3	3	1	1	2	2	2	2	2	2	2	2	2	3	2	2
231	37	F	2	14	0	PRIVATE	REGIONAL	1	1	1	2,3	5	2,3	NA	1	1	3	1	1	1	3	3	3	3	3	3	3	3	3	3	3	3	3	3	1	3	3	1	1	1	1	1	1	1	1	1	2	NA	1
232	31	F	2	10	0	PRIVATE	REGIONAL	2	2	2	3	5	3	1	2	3	1	1	1	3	3	3	3	2	3	3	3	2	3	2	2	2	3	1	3	1	1	3	3	3	2	2	3	3	1	3	3	2	3
233	53	F	2	25	5	PRIVATE	REGIONAL	2	1	1	1,2,3	5	1,2	1	1	1	1	1	1	3	3	3	3	3	3	3	3	3	3	3	3	3	3	3	3	1	1	1	2	2	3	3	3	3	3	3	3	1	1
234	25	F	1	NA	0	PRIVATE	REGIONAL	1	1	3	3	5	3	1	2	3	NA	NA	NA	3	3	3	3	2	3	3	3	2	3	2	3	2	3	2	3	1	1	3	3	3	2	2	3	3	1	NA	3	2	3
235	35	F	2	10	4	PRIVATE	REGIONAL	2	1	2	2	5	2	NA	1	1	NA	1	1	3	3	3	3	3	3	3	3	3	3	3	3	3	3	NA	3		3	2	2	2	2	2	2	2	2	2	3	1	2
236	24	F	2	2	1	PRIVATE	METRO	1	1	2	2	4	2	1	1	1	1	1	1	3	3	3	3	3	3	3	3	3	3	3	3	3	3	3	3	3	3	2	2	2	2	2	2	2	2	2	3	1	2
237	26	F	1	3	0	PRIVATE	REGIONAL	1	1	2	1	5	1	1	1	1	1	1	1	3	4	3	4	4	4	4	4	4	4	4	4	4	4	4	4	4	1	2	2	2	2	2	2	2	2	2	4	1	2
238	33	F	2	10	0	PRIVATE	REGIONAL	1	1	2	2,3	5	2,3	2	1	1	3	1	1	1	3	3	3	3	3	3	3	3	3	3	3	3	3	3	3	3	1	1	1	1	1	1	1	1	1	1	2	2	1
239	23	F	2	NA	0	PRIVATE	METRO	1	1	1	2,3	5	2,3	2	1	1	3	1	1	1	3	3	3	3	3	3	3	3	3	3	3	3	3	3	1	3	1	1	1	1	1	1	1	1	1	1	2	2	1
240	29	F	2	NA	0	PRIVATE	REGIONAL	1	1	3	2	3	1,2,3	1	1	1	1	1	1	4	4	3	4	4	3	4	4	4	4	4	4	4	4	2	3	1	1	2	2	1	1	1	1	1	3	NA	3	1	2
241	36	F	1	10	0	PRIVATE	METRO	1	1	1	1,2	5	1,2	1	1	1	1	1	1	3	3	3	3	3	3	3	3	3	3	3	3	3	3	3	3	3	3	1	1	1	1	1	1	1	1	1	2	2	1
242	26	F	1	4	3	PRIVATE	METRO	1	1	1	2	5	1,2	1	1	1	1	1	1	3	3	3	3	3	3	3	3	3	3	3	3	3	3	3	3	3	3	NA	NA	NA	1	1	1	NA	NA	NA	3	2	NA
243	32	F	2	9	0	PRIVATE	METRO	1	1	2	1,2	5	1,2	1	NA	2	3	NA	1	4	3	3	3	4	3	3	3	3	3	3	3	3	3	3	3		3	2	2	3	2	2	3	3	3	3	1	2	2
244	52	F	1	22	5	PRIVATE	METRO	1	1	1	1,2	5	1,2	2	2	3	1	2	3	3	3	3	3	3	3	3	3	3	3	3	3	3	3	3	3	3	1	2	1	3	1	2	1	1	1	1	3	1	NA
245	25	F	1	4	3	PRIVATE	METRO	1	1	1	2	5	1,2	1	1	1	1	1	1	3	3	3	3	3	3	3	3	3	3	3	3	3	3	3	3	1	1	NA	NA	NA	1	1	1	NA	NA	1	3	2	3
246	24	F	1	2	0	PRIVATE	METRO	1	1	2	1	5	1	1	NA	2	3	NA	1	3	3	3	3	3	3	3	3	3	3	3	3	3	3	3	3	1	1	2	2	3	2	1	2	NA	NA	NA	1	2	2
247	23	F	1	NA	0	PRIVATE	METRO	1	1	2	2	5	3	1	NA	NA	1	NA	NA	1	1	1	1	1	1	1	1	1	1	1	1	1	1	1	1	1	1	1	1	1	1	1	1	1	1	1	3	1	2
248	54	F	2	30	20	PRIVATE	REGIONAL	2	1	2	1	2	1	2	2	2	2	2	2	3	3	3	3	3	3	3	3	3	3	3	3	3	3	3	3	3	3	2	2	2	2	2	2	2	2	2	3	1	2
249	30	F	2	20	10	PRIVATE	REGIONAL	1	1	2	1	1	1	2	2	2	2	2	2	3	3	3	3	3	3	3	3	3	3	3	3	3	3	3	3	3	3	2	2	2	2	2	2	2	2	2	3	1	2
250	24	F	2	15	5	PRIVATE	REGIONAL	1	1	2	1	2	1	2	2	2	2	2	2	3	3	3	3	3	3	3	3	3	3	3	3	3	3	3	3	3	3	2	2	2	2	2	2	2	2	2	3	1	2
251	22	F	2	10	6	PRIVATE	REGIONAL	1	2	3	1	1	1	2	2	2	2	2	2	3	3	3	3	3	3	3	3	3	3	3	3	3	3	3	3	3	3	2	2	2	2	2	2	2	2	2	3	1	2
252	52	F	2	30	25	PRIVATE	RURAL	1	2	2	1	2	1	2	2	2	2	2	2	3	3	3	3	3	3	3	3	3	3	3	3	3	3	3	3	3	3	2	2	2	2	2	2	2	2	2	3	2	2
253	27	F	2	4	0	PRIVATE	REGIONAL	2	1	2	2	5	2	1	NA	NA	1	NA	NA	3	3	3	3	3	3	3	3	3	3	3	3	3	3	3	3	3	3	1	1	1	1	1	1	2	2	2	2	1	1
254	33	F	2	9	3	PRIVATE	REGIONAL	1	1	2	1	5	2	2	NA	NA	2	NA	NA	4	3	3	3	3	3	3	3	3	3	3	3	3	3	3	3	3	3	3	1	2	3	3	2	2	2	2	3	NA	3
255	31	F	2	4	10	PRIVATE	REGIONAL	3	1	3	1,2,3	3	1,2,3	NA	1	NA	NA	2	NA	3	3	3	4	3	3	3	3	3	3	3	2	3	2	3	NA	3	NA	1	1	1	1	1	NA	NA	NA	NA	3	2	2
256	49	F	2	27	0	PRIVATE	REGIONAL	1	1	2	2	5	3	2	NA	3	2	3	3	3	3	3	3	NA	3	1	3	1	1	3	3	3	4		2		2	1	NA	1	NA	NA	1	NA	NA	NA	2	2	3
257	35	F	2	12	0	PRIVATE	REGIONAL	1	1	1	2	5	2	NA	1	NA	1	NA	NA	3	3	2	2	NA	3	3	3	3	2	1	2	2	2	2	2	2	2	3	NA	3	NA	NA	NA	NA	NA	1	2	2	NA
258	28	F	2	5	0	PRIVATE	REGIONAL	1	1	1	2	5	2	1	NA	NA	1	NA	NA	3	3	2	3	3	NA	2	2	2	2	1	1	2	2	3	3	2	1	1	1	2	1	2	1	2	1	2	2	2	1
259	35	F	2	10	0	PRIVATE	RURAL	1	1	1	2	1	1	1	NA	NA	1	NA	NA	3	1	3	3	3	1	3	3	3	3	3	3	3	1	3	3	3	3	1	2	2	NA	NA	NA	NA	NA	NA	1	1	1
260	36	F	2	10	0	PRIVATE	RURAL	1	1	2	2	2	4	NA	1	NA	NA	1	NA	3	1	3	3	3	1	3	3	3	1	3	3	3	1	3	2	3	1	1	1	2	NA	NA	NA	NA	NA	1	1	1	1
261	43	F	2	20	0	PRIVATE	RURAL	1	1	3	3	5	2	NA	1	3	NA	1	3	3	3	3	1	3	3	3	3	3	1	3	3	3	3	3	3	3	3	2	2	2	NA	NA	NA	NA	NA	NA	3	2	2
262	32	F	2	6	0	PRIVATE	REGIONAL	1	NA	5	2	5	2	NA	1	NA	NA	1	NA	3	3	3	3	3	3	3	3	1	3	2	3	2	3	2	3	2	1	NA	1	1	1	NA	NA	NA	NA	NA	3	1	NA
263	22	F	1	NA	0	PRIVATE	REGIONAL	2	1	3	1	5	1	2	NA	NA	NA	2	NA	3	3	3	3	3	3	3	3	3	3	3	3	3	3	3	3	3	3	2	2	2	2	2	2	2	2	2	2	2	2
264	32	F	2	9	2	PRIVATE	REGIONAL	1	1	3	2	5	2	NA	1	NA	1	NA	1	3	3	3	3	3	3	3	3	3	3	3	3	3	3	3	3	3	3	2	2	NA	NA	NA	NA	2	NA	NA	3	1	2
265	27	F	2	3	3	PRIVATE	REGIONAL	1	1	3	2	3	2	1	2	2	1	2	2	3	2	3	3	3	3	3	3	3	2	3	3	3	2	3	3	3	1	2	2	2	2	3	2	3	1	2	3	1	2
266	25	F	2	2	1	PRIVATE	REGIONAL	1	1	3	2	3	2	1	1	1	1	1	2	3	2	2	3	3	2	2	3	2	3	2	3	3	1	3	1	1	1	1	2	2	1	1	2	2	2	1	3	1	2
267	38	F	2	10	4	PRIVATE	REGIONAL	2	1	3	2	2	2	2	2	2	2	2	2	1	2	3	3	3	2	3	3	3	3	3	3	3	3	3	3	1	1	2	2	1	2	2	2	2	2	2	3	1	2
268	35	F	2	10	4	PRIVATE	REGIONAL	2	2	2	3	2	2	2	2	2	2	2	2	3	3	3	3	3	3	3	3	3	2	3	3	3	2	2	2	1	2	2	2	2	2	1	1	2	2	1	3	2	2
269	28	F	2	8	4	PRIVATE	REGIONAL	1	2	3	2	5	1	1	2	2	1	2	2	2	3	3	2	3	2	2	2	1	3	2	3	3	2	1	3	2	2	1	2	2	1	2	2	1	2	1	1	1	1
270	30	F	2	10	6	PRIVATE	REGIONAL	1	1	3	2	5	2	1	2	2	1	1	2	1	1	2	2	2	1	1	2	3	3	3	3	3	3	1	3	2	1	1	2	1	2	2	2	2	1	1	1	2	1
271	32	F	2	12	6	PRIVATE	REGIONAL	1	1	3	2	5	2	1	2	1	1	2	1	1	2	1	1	1	2	1	3	2	3	2	2	2	2	1	3	1	3	1	1	1	1	1	1	1	1	1	1	1	1
272	35	F	2	10	5	PRIVATE	REGIONAL	2	2	5	3	5	1	1	2	1	1	1	1	3	3	3	3	2	3	2	NA	3	NA	NA	NA	1	NA	1	1	1	1	NA	NA	1	1	1	NA	NA	NA	NA	3	1	NA
273	45	F	2	12	5	PRIVATE	REGIONAL	2	2	3	3	4	2	2	2	2	2	2	2	2	2	3	3	2	3	3	3	2	3	3	3	3	2	3	3	1	2	NA	2	2	NA	2	NA	2	2	2	3	1	2
274	33	F	2	11	2	PRIVATE	REGIONAL	1	1	3	2	3	2	3	1	1	3	1	1	4	4	4	4	4	4	3	4	3	4	3	4	4	4	3	4	2	1	1	1	1	NA	NA	NA	NA	NA	NA	4	2	1
275	35	F	2	9	1	PRIVATE	REGIONAL	1	1	3	3	5	3	3	2	1	3	1	1	3	4	4	4	4	4	4	4	4	4	4	4	4	4	4	4	1	1	NA	NA	1	1	1	NA	NA	NA	NA	4	2	1
276	32	F	2	10	1	PRIVATE	REGIONAL	1	1	3	2	3	2	1	3	3	3	1	1	4	3	4	4	4	4	4	4	4	4	4	4	4	4	4	4	2	1	3	1	1	1	1	3	3	3	NA	3	2	1
277	30	F	1	3	1	PRIVATE	REGIONAL	1	1	3	3	5	3	3	1	1	1	1	1	4	4	4	4	4	4	4	4	4	4	4	4	4	4	4	4	1	1	2	3	1	3	3	3	3	3	NA	3	1	NA
278	57	F	2	32	0	PRIVATE	REGIONAL	3	2	1	1	5	4	2	3	2	2	3	2	3	3	3	3	3	3	3	3	3	3	3	3	3	3	3	3	1	1	1	1	1	2	2	2	2	2	NA	3	1	1
279	22	F	2	1	0	PRIVATE	REGIONAL	2	1	2	2	2	4	2	2	2	2	2	2	3	3	3	3	3	3	3	3	3	3	3	3	3	3	3	3		NA	2	2	2	2	2	2	2	2	NA	3	1	3
280	25	F	2	4	0	PRIVATE	REGIONAL	1	1	2	2	5	1,2,3	1	2	3	1	2	3	3	3	3	3	3	3	3	3	3	3	3	3	3	3	3	3		NA	1	1	1	1	1	1	1	1	NA	3	2	1
281	32	M	1	8	8	PRIVATE	REGIONAL	1	1	1	2	6	4	1	1	1	1	1	1	4	3	4	4	3	4	4	4	4	3	3	NA	3	3	3	3		NA	1	NA	NA	1	1	NA	NA	NA	NA	3	1	1
282	27	F	1	4	0	PRIVATE	REGIONAL	3	1	3	1,2,3	5	1	1	3	2	1	2	1	1	3	1	2	1	2	1	3	3	2	3	2	3	2	1	3	1	2	2	2	2	2	2	2	2	2	NA	3	2	3
283	35	F	1	8	3	PRIVATE	REGIONAL	1	1	1	1,2	5	1,2,3	1	3	2	1	2	1	1	3	1	3	1	2	1	3	1	3	2	2	2	3	1	3	2	1	3	3	3	3	2	3	3	3	NA	3	1	3
284	32	F	1	4	2	PRIVATE	METRO	1	1	2	3	5	3	2	2	2	2	2	2	3	3	3	3	3	3	3	3	3	3	3	3	3	3	3	3	1	1	2	2	2	2	2	2	2	2	2	3	1	2
285	26	F	2	4	0	PRIVATE	METRO	1	1	2	1	2	3	NA	2	NA	NA	2	NA	3	3	3	3	3	3	3	3	3	3	3	3	3	3	3	3		NA	2	2	2	2	2	2	2	2	NA	3	1	2
286	30	F	1	2	0	PRIVATE	REGIONAL	1	1	2	3	5	3	2	2	2	2	2	2	3	3	3	3	3	3	3	3	3	3	3	3	3	3	3	3	1	1	2	2	2	2	2	2	2	2	2	3	1	2
287	38	F	1	3	0	PRIVATE	REGIONAL	1	1	2	3	5	3	2	2	2	2	2	2	3	3	3	3	3	3	3	3	3	3	3	3	3	3	3	3	1	2	2	2	2	2	2	2	2	2	2	3	NA	2
288	49	F	2	28	13	PRIVATE	METRO	1	1	2	3	5	2	NA	2	NA	NA	2	NA	3	3	3	3	3	3	3	3	3	3	3	3	3	3	3	3	1	1	2	2	2	2	2	2	2	2	2	3	1	2
289	57	F	2	32	20	PRIVATE	METRO	1	1	2	3	5	4	NA	1	NA	2	NA	NA	3	3	3	3	3	3	3	3	3	3	3	3	3	3	3	3	1	1	1	1	NA	NA	NA	NA	NA	NA	NA	3	2	1
290	48	F	2	25	11	PRIVATE	METRO	1	2	2	3	5	3	NA	2	NA	NA	2	NA	3	3	3	3	3	3	3	3	3	3	3	3	3	3	3	3		1	2	2	2	2	2	2	2	2	2	3	1	2
291	32	F	2	6	4	PRIVATE	METRO	1	2	2	3	5	3	NA	2	NA	NA	2	NA	3	3	3	3	3	3	3	3	3	3	3	3	3	3	3	3		1	2	2	2	2	2	2	2	2	2	3	1	2
292	45	F	1	20	10	PRIVATE	REGIONAL	1	1	2	3	5	3	NA	2	NA	NA	2	NA	3	3	3	3	3	3	3	3	3	3	3	3	3	3	3	3		2	2	2	2	2	2	2	2	2	2	3	2	2
293	32	F	2	8	4	PRIVATE	REGIONAL	1	1	3	2	5	2	1	2	1	1	2	2	3	3	3	3	3	3	3	4	3	4	3	4	3	4	3	4	3	1	1	2	1	2	2	1	1	1	2	3	1	1
294	40	F	2	16	10	PRIVATE	REGIONAL	1	1	3	2	5	2	1	2	1	1	2	1	3	3	3	4	3	3	3	4	3	3	3	4	3	3	3	4	1	3	1	2	1	2	2	2	2	1	1	3	1	1
295	35	F	2	13	10	PRIVATE	REGIONAL	1	1	3	2	5	2	1	2	1	1	2	1	3	3	3	4	3	3	4	3	4	3	3	4	3	4	3	2	3	2	1	2	1	1	2	2	1	1	1	3	1	1
296	40	F	2	15	4	PRIVATE	REGIONAL	2	1	3	2	5	2	1	2	1	1	1	1	3	3	3	3	3	4	3	3	3	4	4	3	4	3	3	3	2	2	1	2	1	2	1	1	1	2	2	3	1	1
297	30	F	2	6	2	PRIVATE	REGIONAL	1	1	3	2	5	2	1	2	1	1	2	1	3	3	3	3	3	3	4	4	4	4	4	4	4	3	2	3	3	1	1	2	1	2	2	2	2	1	1	3	1	1
298	50	F	2	25	10	PRIVATE	REGIONAL	1	1	3	2	5	2	1	1	1	1	2	1	3	2	3	3	3	2	4	2	4	1	4	3	4	3	4	3	1	1	1	1	1	2	2	2	1	1	1	3	1	1
299	50	F	2	25	5	PRIVATE	REGIONAL	1	1	3	2	5	2	1	2	1	1	1	1	3	3	4	3	3	4	3	4	3	3	4	3	4	4	4	4	1	4	1	2	2	1	1	2	2	2	1	3	1	1
300	42	F	2	17	10	PRIVATE	REGIONAL	1	1	3	2	5	2	1	2	1	1	2	1	3	3	3	3	4	3	4	4	3	4	3	4	3	4	3	3	3	3	1	1	2	2	2	1	1	1	2	3	1	1
301	45	F	2	20	10	PRIVATE	REGIONAL	1	1	3	2	5	2	1	2	1	1	1	2	3	3	4	4	3	3	3	3	3	3	4	4	4	4	3	4	3	1	1	2	2	1	2	1	2	2	2	3	1	1
302	28	F	2	6	0	PRIVATE	REGIONAL	1	1	4	1	2	1,2	1	1	1	2	2	2	3	3	3	3	3	3	3	3	3	3	3	3	3	3	3	NA	1	NA	2	2	2	2	2	2	2	2	2	3	1	2
303	30	F	2	8	4	PRIVATE	REGIONAL	1	1	3	2	5	2	1	2	3	1	2	1	1	1	3	2	3	2	4	3	3	3	3	3	3	3	2	3	2	1	1	2	2	2	1	1	1	3	3	3	1	2
304	30	F	1	8	3	PRIVATE	REGIONAL	1	1	5	1	4	1,2	1	1	1	1	1	1	3	3	3	3	3	3	3	3	3	3	3	3	3	3	NA	3		NA	2	2	2	2	2	2	2	2	NA	3	1	2
305	30	F	2	7	2	PRIVATE	REGIONAL	1	1	2	3	5	2	NA	2	3	NA	NA	3	3	3	2	3	2	2	3	2	3	3	2	2	3	3	1	2	2	2	3	3	2	2	2	3	3	3	3	4	2	3
306	32	F	1	8	4	PRIVATE	REGIONAL	1	1	5	3	5	2	1	NA	NA	NA	NA	3	3	3	2	3	2	3	3	3	3	3	2	2	3	3	2	2	2	2	3	2	2	2	2	2	2	2	2	2	2	2
307	26	F	1	3	2	PRIVATE	REGIONAL	2	1	5	3	5	3	NA	2	NA	NA	2	NA	3	3	3	NA	2	3	2	2	2	2	2	2	2	2	NA	1	1	1	2	3	2	1	2	3	1	2	3	2	2	2
308	23	F	2	12	1	PRIVATE	REGIONAL	1	1	2	3	5	3	1	NA	NA	NA	NA	3	3	3	2	3	3	3	3	3	2	2	3	3	3	1	2	1	2	1	3	2	2	2	2	2	2	2	2	2	2	2
309	53	F	1	29	7	PRIVATE	REGIONAL	1	1	2	3	5	2	NA	2	NA	NA	NA	3	3	3	2	3	2	2	3	2	3	3	2	2	3	2	1	23	1	2	3	2	2	2	3	2	2	2	2	2	2	2
310	32	M	2	10	6	PRIVATE	REGIONAL	2	2	5	3	5	3	NA	2	NA	NA	2	2	2	NA	NA	2	2	3	2	NA	3	3	3	NA	3	3	2	2	2	2	2	2	2	2	NA	NA	2	2	2	2	2	3
311	21	F	1	1	0	PRIVATE	REGIONAL	1	1	2	3	5	3	1	NA	NA	NA	2	NA	3	3	2	3	3	3	3	3	3	3	3	2	3	2	3	2	1	2	3	3	3	3	3	1	1	1	1	2	2	2
312	28	F	2	7	6	PRIVATE	REGIONAL	1	1	2	3	5	2	2	NA	3	NA	NA	NA	3	3	2	3	3	2	2	2	3	3	3	3	2	3	2	3	2	1	3	2	2	2	3	2	3	3	3	2	2	2
313	34	F	2	9	1	PRIVATE	REGIONAL	1	1	3	3	5	3	1	NA	NA	NA	1	NA	4	3	2	3	2	3	3	3	3	3	2	3	2	3	3	3	2	2	3	3	2	NA	NA	NA	NA	NA	NA	2	2	2
314	36	F	2	6	3	PRIVATE	REGIONAL	1	1	2	3	5	3	1	NA	NA	NA	1	NA	3	3	2	3	2	3	2	3	2	3	2	3	2	3	3	2	2	2	2	2	NA	1	1	1	NA	NA	NA	2	1	2
315	32	F	1	2	0	PRIVATE	REGIONAL	1	1	2	3	5	1	NA	1	NA	1	NA	1	4	3	2	3	2	3	3	2	3	2	2	2	3	2	3	2	2	2	2	2	2	NA	NA	NA	NA	NA	NA	2	2	2
316	35	F	1	6	2	PRIVATE	REGIONAL	1	1	2	3	5	2	1	NA	NA	1	NA	NA	4	3	3	3	3	3	2	2	2	3	2	3	3	3	2	3	1	2	2	2	2	NA	NA	NA	NA	NA	NA	2	2	2
317	30	F	2	8	3	PRIVATE	REGIONAL	1	1	2	3	5	3	1	NA	NA	NA	1	NA	4	3	2	3	2	3	3	3	3	3	2	3	3	2	2	2	2	2	2	2	2	NA	NA	NA	NA	NA	NA	2	2	2
318	22	F	2	2	2	PRIVATE	REGIONAL	1	1	5	2	5	2	NA	3	NA	1	NA	NA	4	3	3	4	3	3	4	2	4	3	1	3	3	2	NA	2		3	1	1	2	1	1	NA	NA	NA	NA	2	1	1
319	23	F	1	1	1	PRIVATE	REGIONAL	1	1	3	1,2,3	5	1	1	1	1	1	1	1	3	3	3	3	3	3	3	3	3	3	3	3	3	3	NA	3		3	1	1	1	1	1	1	1	1	1	2	1	1
320	29	F	2	4	4	PRIVATE	REGIONAL	1	1	3	1,2,3	5	1	1	1	1	1	1	1	4	3	3	3	3	3	3	3	4	3	3	3	4	3	3	3		NA	1	1	1	1	1	1	1	1	NA	2	1	1
322	36	F	2	17	5	PRIVATE	REGIONAL	1	1	3	1,2,3	5	1	1	1	1	1	1	1	3	3	3	3	3	3	3	3	3	3	3	3	3	3	NA	3		NA	1	1	1	1	1	1	1	1	1	2	1	1
323	29	F	1	3	1	PRIVATE	REGIONAL	2	1	3	2,3	5	2	2	2	3	3	3	3	4	3	3	3	4	3	3	3	4	3	3	3	3	3	1	3	1	NA	NA	NA	1	1	1	3	3	3	NA	3	1	1
324	34	F	2	9	1	PRIVATE	REGIONAL	2	1	2	2	5	2	2	2	3	3	3	3	3	3	3	4	4	4	4	3	3	3	3	3	3	3	1	3	1	1	2	2	2	2	2	3	3	2	2	3	2	NA
325	23	F	1	1	1	PRIVATE	REGIONAL	1	1	2	3	5	2	3	2	2	2	3	2	3	3	3	3	3	3	3	3	NA	3	NA	3	NA	3	NA	3		NA	1	1	3	3	3	3	2	2	2	2	2	1
326	35	F	1	8	3	PRIVATE	REGIONAL	1	1	2	1	5	1	1	1	1	1	1	1	3	3	3	3	3	3	3	3	3	3	3	3	3	3	NA	3		NA	1	2	1	3	2	3	3	1	2	2	1	1
327	36	F	2	11	3	PRIVATE	RURAL	1	1	3	1	5	1	NA	2	NA	NA	2	NA	3	3	3	3	3	3	3	3	3	3	3	3	3	3	NA	3		NA	1	1	1	1	1	1	1	1	1	3	2	1
328	30	F	2	6	0	PRIVATE	RURAL	1	1	3	1	5	1	NA	2	NA	NA	2	NA	3	3	3	3	3	3	3	3	3	3	3	3	3	3	3	3		3	1	1	1	1	1	1	1	1	1	3	2	1
329	27	F	2	4	0	PRIVATE	RURAL	3	1	3	1	5	1	NA	2	NA	NA	2	NA	3	3	3	3	3	3	3	3	3	3	3	3	3	3	NA	3		NA	1	1	1	1	1	1	1	1	1	3	2	1
330	50	F	2	25	1	PRIVATE	RURAL	1	1	3	1	5	1	NA	3	NA	NA	2	NA	3	3	3	3	3	3	3	3	3	3	3	3	3	3	3	3		NA	1	1	1	1	1	1	1	1	1	3	2	1
331	55	F	1	40	4	PRIVATE	REGIONAL	2	1	1	1,2,3	5	1,2,3	1	1	1	1	1	1	4	3	2	2	1	3	3	3	4	3	1	2	1	3	1	2		2	3	2	1	3	2	3	3	3	NA	3	1	3
332	28	F	2	4	0	PRIVATE	REGIONAL	1	1	1	2	5	2	3	3	1	1	1	1	3	3	3	3	3	3	3	3	3	3	3	3	3	3	3	3	1	1	3	3	3	3	3	3	3	3	NA	3	1	3
333	36	F	2	10	2	PRIVATE	METRO	1	1	2	1	5	1	3	NA	NA	NA	NA	3	3	3	3	3	3	3	3	3	3	3	3	3	3	3	3	3	1	1	2	2	3	3	2	3	1	1	NA	3	2	1
334	27	F	2	6	0	PRIVATE	REGIONAL	2	1	4	2	5	1,2,3	2	1	1	2	1	1	3	3	3	3	3	3	3	3	3	3	3	3	2	3	2	2	1	1	1	2	2	3	2	3	3	1	NA	1	2	2
335	54	F	2	28	0	PRIVATE	REGIONAL	2	1	4	2	5	1,2,3	2	1	1	2	1	1	3	3	3	3	3	3	3	3	3	3	3	3	2	3	2	2	1	2	2	2	2	3	2	3	3	1	NA	3	2	2
336	33	F	2	9	2	PRIVATE	METRO	3	1	2	3	5	3	2	2	2	2	2	2	3	3	3	3	3	3	3	3	3	3	3	3	3	3	NA	3		NA	1	1	1	1	1	1	1	1	1	2	2	2
337	48	F	2	22	5	PRIVATE	METRO	1	1	2	1,2,3	2	1,2	1	1	1	1	1	1	3	3	3	3	3	3	3	3	3	3	3	3	3	3	3	3	3	3	NA	1	1	1	1	1	1	1	1	3	1	1
338	38	F	2	8	0	PRIVATE	METRO	1	1	2	1,2,3	5	1,2	1	2	3	1	2	3	3	3	3	3	3	3	3	3	3	3	3	3	3	3	3	3	3	3	1	1	1	1	1	1	1	1	1	3	1	1
339	24	F	2	4	0	PRIVATE	REGIONAL	1	2	3	3	5	3	2	2	2	2	2	2	3	3	3	3	3	3	3	3	3	3	3	3	3	3	3	3	3	3	2	2	2	2	2	2	2	2	2	3	2	2
340	23	F	2	2	0	PRIVATE	REGIONAL	1	1	3	3	5	3	2	NA	NA	NA	2	NA	3	3	3	3	3	3	3	3	3	3	3	3	3	3	3	3	3	2	2	2	2	2	2	2	2	2	2	3	2	2
341	56	F	2	32	0	PUBLIC	RURAL	1	2	3	3	5	3	2	2	2	2	2	2	3	3	3	3	3	3	3	3	3	3	3	3	3	3	3	3	3	3	2	2	2	2	2	2	2	2	2	3	2	2
342	31	F	2	8	0	PUBLIC	REGIONAL	1	2	3	3	5	3	2	2	2	2	2	2	3	3	3	3	3	3	3	3	3	3	3	3	3	3	3	3	3	3	2	2	2	2	2	2	2	2	2	3	2	2
343	28	F	2	7	0	PRIVATE	REGIONAL	1	2	3	3	5	3	2	2	2	2	2	2	3	3	3	3	3	3	3	3	3	3	3	3	3	3	3	3	3	3	2	2	2	2	2	2	2	2	2	2	2	2
344	31	F	2	4	1	PRIVATE	REGIONAL	2	1	3	3	5	3	NA	2	NA	NA	2	NA	4	4	4	4	4	4	4	4	4	4	4	4	4	4	4	4		NA	3	3	3	3	NA	NA	NA	NA	NA	3	2	2
345	55	F	2	30	6	PRIVATE	REGIONAL	2	1	2	3	5	3	NA	1	NA	1	NA	NA	4	4	4	4	4	4	4	4	4	4	4	4	4	4	4	4		NA	3	3	NA	NA	NA	NA	NA	NA	NA	2	2	3
346	22	F	1	3	2	PRIVATE	REGIONAL	2	2	5	2	5	4	1	1	1	1	1	1	3	1	3	1	3	1	3	1	3	1	3	1	3	1	2	1	2	1	2	2	2	2	2	2	2	2	2	3	1	2
347	41	F	1	12	10	PRIVATE	REGIONAL	1	2	5	3	5	3	2	2	2	2	2	2	2	1	2	1	2	1	2	1	2	1	2	1	NA	1	NA	1		1	1	1	1	1	1	1	1	1	1	3	1	1
348	57	F	1	25	10	PRIVATE	REGIONAL	1	2	3	2	5	2	2	2	2	2	2	2	2	2	2	2	2	2	2	2	2	2	2	2	2	2	NA	2		2	2	2	2	2	2	2	2	2	2	3	1	1
349	45	F	2	20	15	PRIVATE	REGIONAL	1	1	2	3	2	3	2	NA	NA	NA	2	NA	2	3	2	3	2	3	2	3	2	3	2	3	2	3	2	3	2	2	2	2	2	2	2	2	2	2	2	3	1	2
350	30	F	2	5	3	PRIVATE	RURAL	1	1	2	1	2	3	2	2	2	2	2	2	3	2	3	2	3	2	3	2	3	2	3	2	3	2	2	2	2	2	2	2	2	2	2	2	2	2	2	3	1	2
351	45	F	2	10	5	PRIVATE	REGIONAL	1	1	2	3	2	3	2	2	2	2	2	2	2	3	2	3	2	3	2	3	2	3	2	3	2	3	2	3	2	2	2	2	2	2	2	2	2	2	2	3	1	2
352	30	F	1	8	8	PRIVATE	REGIONAL	1	2	2	3	2	2	2	2	2	2	2	2	2	2	2	2	2	2	2	2	2	2	2	2	2	2	2	2	2	2	2	2	2	2	2	2	2	2	2	3	1	2
353	28	F	1	6	6	PRIVATE	REGIONAL	1	2	2	2	2	2	2	2	2	2	2	2	2	2	2	2	2	2	2	2	2	2	3	2	2	2	2	2	2	2	2	2	2	2	2	2	2	2	2	3	1	2
354	52	F	2	28	10	PRIVATE	REGIONAL	2	2	3	2	5	1	NA	NA	2	2	NA	NA	2	3	3	3	3	3	3	3	3	3	3	3	3	3	2	3	2	3	2	2	2	2	2	2	2	2	2	3	2	3
355	30	F	1	6	6	PRIVATE	RURAL	1	1	1	1	5	3	1	1	1	2	2	2	1	3	1	3	1	3	1	3	1	3	1	3	1	3	2	3	2	1	2	2	2	2	2	2	2	2	2	3	1	2
356	32	F	1	8	6	PRIVATE	REGIONAL	1	1	2	3	5	3	2	2	2	1	1	1	2	2	2	2	2	2	2	2	2	2	2	2	2	2	2	2	2	2	2	2	2	2	2	2	2	2	2	3	1	2
357	25	F	1	5	5	PRIVATE	REGIONAL	1	1	1	1	5	2	2	2	2	2	2	2	1	3	1	3	1	3	1	3	1	3	1	3	1	3	2	3	2	3	2	2	2	2	2	2	2	2	2	3	1	2
358	36	F	1	25	20	PRIVATE	REGIONAL	1	1	2	3	1	3	2	2	2	2	2	2	1	1	1	3	1	3	1	3	1	1	1	2	1	2	1	2	1	2	2	2	2	2	2	2	2	2	2	2	1	1
359	49	F	2	26	14	PUBLIC	REGIONAL	1	1	2	3	5	3	1	NA	NA	1	NA	NA	4	3	3	4	3	3	3	3	3	3	3	3	3	3	3	3	2	1	2	2	1	1	2	1	1	1	1	2	2	3
360	33	F	1	10	0	PRIVATE	RURAL	1	1	2	1	5	2	1	1	1	1	1	1	3	3	3	3	3	3	3	3	3	3	3	3	3	3	NA	3		NA	2	2	2	2	2	2	2	2	2	3	2	2
361	24	F	2	2	0	PRIVATE	RURAL	3	2	2	1	5	3	1	1	1	1	1	1	3	3	3	3	3	3	3	3	3	3	3	3	3	3	NA	3		NA	2	2	2	2	2	2	2	2	2	3	2	2
362	30	F	2	10	3	PRIVATE	RURAL	3	2	3	1	5	3	1	1	1	1	1	1	3	3	3	3	3	3	3	3	3	3	3	3	3	3	NA	3		1	2	2	2	2	2	2	2	2	2	3	2	2
363	37	F	1	22	16	PRIVATE	REGIONAL	3	2	2	2	2	4	3	3	3	3	3	3	2	2	2	2	2	2	1	2	1	2	1	2	1	2	2	2	2	2	1	1	1	1	1	1	1	1	1	2	1	1
364	55	F	1	29	15	PRIVATE	REGIONAL	2	1	2	1	5	1	2	2	2	2	2	2	2	1	2	1	2	1	2	1	2	1	2	1	NA	1	2	1	2	1	1	1	1	1	1	1	1	1	1	2	1	1
365	39	F	1	12	12	PRIVATE	REGIONAL	1	1	2	3	5	3	1	NA	2	NA	NA	2	NA	3	3	3	3	3	3	3	3	3	3	3	3	3	3	NA		NA	2	2	2	2	2	2	2	2	2	2	3	NA
366	57	M	1	32	10	PRIVATE	REGIONAL	1	1	2	3	2	3	1	1	1	1	1	1	1	3	1	3	1	3	1	3	1	3	1	3	1	3	NA	3		NA	2	2	2	2	NA	2	2	NA	NA	3	1	2
367	51	F	2	20	2	PRIVATE	REGIONAL	1	1	NA	1	5	1	1	NA	NA	1	NA	NA	3	3	3	3	3	3	3	3	3	3	3	3	3	3	3	3		2	2	2	NA	1	1	1	3	NA	NA	3	2	3
368	39	F	1	17	6	PRIVATE	REGIONAL	2	1	1	2	5	1	1	NA	NA	NA	NA	2	3	3	3	3	3	3	3	3	3	3	3	3	3	3	3	3		2	NA	1	NA	NA	NA	NA	NA	NA	NA	3	2	3
369	50	F	2	27	2	PRIVATE	REGIONAL	1	1	3	2	5	1	1	1	1	1	1	1	3	3	3	3	NA	3	3	3	3	3	2	3	3	NA	3	3	1	2	NA	2	NA	NA	NA	NA	NA	NA	NA	3	1	1
370	57	F	2	33	0	PRIVATE	RURAL	3	NA	3	1	NA	1	2	1	3	1	1	3	NA	NA	NA	NA	1	NA	NA	NA	NA	NA	1	NA	NA	NA	2	NA	1	NA	1	1	2	2	3	3	3	3	3	3	2	NA
371	26	F	1	4	0	PRIVATE	RURAL	3	2	3	1	3	1	1	2	1	1	3	3	4	3	4	1	1	3	3	1	3	1	2	1	1	1	2	1	1	1	1	2	1	2	3	2	3	1	NA	3	2	1
372	51	F	2	32	0	PRIVATE	METRO	3	1	3	1	3	1	1	3	2	1	2	3	3	3	3	3	1	3	3	3	3	3	3	3	1	3	2	3	1	1	3	3	3	2	2	3	3	3	3	3	1	2
373	32	F	1	8	4	PRIVATE	REGIONAL	1	1	1	2	3	1	1	1	1	1	1	1	3	3	3	3	3	4	4	3	3	3	3	3	4	4	3	4		1	2	2	2	2	2	2	2	2	2	3	1	2
374	32	F	1	4	2	PRIVATE	REGIONAL	1	1	1	2	3	1	1	1	1	2	1	2	3	4	3	4	3	4	3	4	3	3	3	3	3	4	3	4		1	2	2	2	2	2	2	2	2	NA	3	1	2
375	25	F	1	5	3	PRIVATE	REGIONAL	1	1	1	3	3	1	2	2	2	2	2	2	3	4	3	4	3	4	3	3	3	3	3	3	3	3	3	3		1	2	3	2	2	2	2	2	2	NA	3	1	2
376	33	F	1	10	5	PRIVATE	REGIONAL	1	1	1	1	3	1	2	2	2	2	2	2	3	4	3	4	3	3	4	3	3	3	3	3	3	4	3	4		1	2	2	2	3	2	2	1	1	NA	3	1	2
377	26	F	1	6	3	PRIVATE	REGIONAL	1	1	1	2	3	1	2	2	2	2	2	2	3	3	4	3	3	3	3	3	3	3	3	3	3	3	3	3		1	2	2	2	2	2	2	2	2	NA	3	1	2
378	33	F	1	11	7	PRIVATE	REGIONAL	1	1	1	1	3	1	1	2	1	1	1	1	4	3	4	4	4	3	4	4	4	3	4	3	4	3	3	3	1	1	3	2	2	2	2	3	3	2	NA	2	1	3
379	50	F	1	28	10	PRIVATE	REGIONAL	1	1	1	1	3	1	1	2	1	1	1	1	4	3	4	4	4	3	4	4	4	3	4	3	4	3	4	3	1	1	2	2	2	2	2	2	2	2	NA	2	1	3
380	36	F	1	14	8	PRIVATE	REGIONAL	1	1	1	2	3	1	1	1	1	1	1	1	4	3	4	3	4	4	4	3	4	3	4	3	4	3	4	3		1	2	2	2	2	2	2	2	NA	NA	3	1	3
381	35	F	1	8	3	PRIVATE	REGIONAL	1	1	1	1,2,3	3	1	2	2	1	2	2	2	3	3	3	4	3	3	3	3	3	2	3	2	3	1	3	1		1	2	2	2	2	2	2	2	2	2	3	1	2
382	53	F	1	31	0	PRIVATE	REGIONAL	3	1	3	1	3	1	1	2	1	1	3	3	4	3	4	3	1	3	4	3	3	3	1	3	3	3	2	3	1	2	3	2	3	2	3	3	3	NA	2	1	2	3
383	28	F	1	5	0	PRIVATE	REGIONAL	1	1	2	1,2,3	5	1,2,3	1	2	1	1	NA	NA	3	3	3	3	3	3	3	3	3	3	3	3	3	3	3	3	1	1	1	2	1	3	2	3	3	3	NA	2	1	2
384	42	F	1	28	0	PRIVATE	REGIONAL	1	1	2	1,2,3	NA	1,2,3	1	2	1	1	2	1	3	3	3	3	3	3	3	3	3	3	3	3	3	3	3	3	1	1	2	3	2	3	2	3	3	3	NA	2	1	2
385	52	F	1	30	0	PRIVATE	REGIONAL	1	1	2	1	5	2	1	2	1	1	2	1	3	3	3	3	3	3	3	3	3	3	3	3	3	3	4	3	1	1	2	3	2	3	2	3	3	3	NA	2	1	2
386	54	F	1	26	0	PRIVATE	REGIONAL	1	1	2	3	5	2	1	2	1	1	2	1	3	3	3	3	3	3	3	3	3	3	3	3	3	3	3	3	1	1	2	3	2	2	3	3	2	1	NA	2	1	2
387	25	F	2	4	2	PRIVATE	REGIONAL	1	1	1	1,2,3	3	1,2,3	1	2	1	1	1	1	3	3	3	3	3	3	3	3	3	3	3	3	3	3	3	3		NA	2	2	2	2	2	2	2	2	2	2	2	2
388	50	F	2	22	10	PRIVATE	REGIONAL	1	1	1	1,2,3	3	1,2,3	1	2	1	1	1	1	3	3	3	3	3	3	3	3	3	4	3	3	3	3	3	3		1	2	2	2	2	2	2	2	2	2	2	2	2
389	34	F	2	14	0	PRIVATE	REGIONAL	1	1	1	1,2,3	5	1,2,3	1	1	1	1	1	NA	3	3	3	3	3	3	3	3	3	3	3	4	3	3	NA	3		2	2	2	2	2	2	2	2	2	NA	3	2	2
390	33	F	1	7	0	PRIVATE	METRO	3	1	1	1	5	3	2	2	2	2	2	2	3	3	3	3	3	3	3	3	3	3	3	3	3	3	NA	3		NA	2	2	2	2	2	2	2	2	NA	3	2	2
391	28	F	2	7	0	PRIVATE	REGIONAL	1	1	2	1	5	2	1	1	1	1	1	1	3	3	3	3	3	3	3	3	2	3	3	2	3	2	3	2	2	2	1	NA	1	NA	NA	NA	NA	NA	NA	2	2	1
392	49	F	2	27	0	PRIVATE	REGIONAL	1	1	2	1,2,3	5	1,2,3	1	1	1	1	1	1	1	3	3	3	3	3	3	3	3	3	3	2	2	3	2	3	2	2	1	1	1	NA	NA	NA	NA	NA	NA	2	2	1
393	27	F	2	5	0	PRIVATE	RURAL	1	1	2	1	1	3	2	1	NA	NA	NA	1	NA	2	3	2	3	3	2	3	NA	2	NA	2	NA	NA	NA	NA	2	NA	1	2	3	NA	NA	NA	NA	NA	NA	3	1	2
394	26	F	2	6	6	PRIVATE	REGIONAL	1	1	2	3	2	2	2	2	2	2	2	2	1	1	1	1	1	1	1	1	1	1	1	1	1	1	1	1		NA	2	2	1	1	1	2	2	2	NA	2	1	1
395	40	F	1	10	5	PRIVATE	REGIONAL	2	1	2	2	2	2	1	2	2	1	1	1	1	2	1	2	1	2	1	2	1	2	1	2	1	2	NA	2		2	1	1	1	1	1	1	1	1	2	1	1	1
396	50	F	2	30	15	PRIVATE	REGIONAL	1	2	1	3	2	2	1	2	2	2	1	1	1	1	1	1	1	1	1	1	1	1	1	1	1	1	1	1	1	1	2	2	2	2	2	2	2	2	2	2	1	1
397	48	F	1	20	10	PRIVATE	REGIONAL	1	2	1	1	3	2	2	2	2	2	2	2	1	2	1	2	1	2	1	2	1	2	1	2	1	2	1	2	1	2	2	2	2	2	2	2	2	2	2	3	1	2
398	30	F	1	7	5	PRIVATE	REGIONAL	1	2	1	3	3	3	2	2	2	2	2	2	3	2	2	2	2	2	2	2	2	2	2	2	2	2	2	2	2	2	2	2	2	2	2	2	2	2	2	3	1	1
[truncated: 17 more columns]
